# Supplementary material for: An in silico approach to the identification of diagnostic and prognostic markers in low-grade gliomas
Source: PeerJ. 2023 Mar 16;11:e15096. doi: 10.7717/peerj.15096 (PMC10024901; doi:10.7717/peerj.15096)
Supplement: Supplemental Information 1 [file peerj-11-15096-s001.xlsx]

## Sheet: DEGs
DEGs TCGA-LGG vs GTEx			DEGs GEO-LGG vs GTEx
Up-regulated	Down-regulated		Up-regulated	Down-regulated
ABCA1	A1BG		A4GALT	A2ML1-AS1
ABCC4	A1BG-AS1		AATBC	AASS
ABCG1	A2M-AS1		ABCA1	ABALON
ABHD4	A2ML1-AS1		ABCC4	ABCB9
ABI3	AARSD1		ABHD12	ABCG4
ABI3BP	ABALON		ABHD14A	ABHD14A-ACY1
AC006466.1	ABCB9		ABHD5	ABHD16B
AC006960.3	ABCG4		ABHD8	ABHD17AP1
AC007490.1	ABHD14A-ACY1		ABI3BP	ABHD17AP3
AC009227.1	ABHD16A		ABRACL	ABHD17AP4
AC012558.1	ABHD16B		ABTB1	ABHD17AP5
AC013391.3	ABHD17AP1		AC000035.1	ABHD17AP6
AC018755.4	ABHD17AP3		AC000078.1	ABLIM2
AC019069.1	ABHD17AP4		AC000095.2	AC000032.1
AC021188.1	ABHD17AP5		AC002044.2	AC000068.2
AC021739.3	ABHD17AP6		AC002069.2	AC000089.1
AC021739.5	ABLIM2		AC002094.5	AC000123.3
AC025211.1	AC000032.1		AC002127.2	AC002044.3
AC053503.1	AC000041.1		AC002128.1	AC002056.1
AC068535.1	AC000068.2		AC002398.1	AC002069.1
AC068643.1	AC000068.3		AC002400.1	AC002094.1
AC074286.1	AC000089.1		AC002429.2	AC002094.2
AC083864.2	AC000095.1		AC002456.1	AC002116.1
AC084782.3	AC000120.1		AC003080.1	AC002116.2
AC090692.1	AC002056.1		AC003989.1	AC002310.5
AC092164.1	AC002094.1		AC003991.1	AC002347.2
AC093620.1	AC002094.2		AC004069.1	AC002398.2
AC099850.3	AC002094.3		AC004076.2	AC002401.1
AC107956.1	AC002116.1		AC004223.2	AC002451.1
AC109439.2	AC002116.2		AC004264.2	AC002519.2
AC113191.1	AC002310.2		AC004492.1	AC002524.1
AC124854.1	AC002310.4		AC004672.1	AC002525.1
AC138207.5	AC002310.5		AC004808.1	AC002543.1
AC233296.1	AC002347.2		AC004816.1	AC002545.1
AC244517.7	AC002398.2		AC004832.4	AC002550.1
ACY3	AC002401.1		AC004832.5	AC002558.1
ADAMTS15	AC002519.2		AC004846.1	AC002558.3
ADAMTS6	AC002524.1		AC004884.2	AC002563.1
ADCYAP1R1	AC002545.1		AC004889.1	AC002985.1
AF127936.1	AC002550.1		AC004890.3	AC002996.1
AIF1	AC002563.1		AC004898.1	AC003002.1
AL118505.1	AC002985.1		AC004918.3	AC003002.2
AL121574.1	AC002996.1		AC004943.1	AC003101.3
AL121827.2	AC003002.1		AC004945.1	AC003688.1
AL133304.3	AC003002.2		AC004951.1	AC003989.2
AL133465.1	AC003002.3		AC004967.1	AC003991.2
AL137779.2	AC003005.1		AC005020.1	AC004022.1
AL139125.2	AC003006.1		AC005096.1	AC004039.1
AL139396.1	AC003101.3		AC005154.1	AC004057.1
AL161785.1	AC003681.1		AC005183.1	AC004223.1
AL354892.2	AC003684.1		AC005255.1	AC004223.3
AL355916.2	AC003688.1		AC005261.5	AC004224.2
AL355974.2	AC003991.2		AC005288.1	AC004263.1
AL391069.3	AC004057.1		AC005326.1	AC004408.1
AL445307.1	AC004076.1		AC005330.1	AC004448.3
AL450311.2	AC004223.3		AC005344.1	AC004453.1
AL513165.1	AC004224.2		AC005476.1	AC004477.1
AL645608.1	AC004232.1		AC005520.3	AC004477.2
AL645608.7	AC004241.1		AC005544.1	AC004491.1
ALOX5AP	AC004408.1		AC005586.1	AC004494.1
ANGPTL2	AC004448.3		AC005618.1	AC004528.2
ANKFN1	AC004453.1		AC005632.2	AC004540.1
ANKRD22	AC004466.1		AC005692.1	AC004542.1
ANKRD44	AC004477.2		AC005695.1	AC004542.2
ANOS1	AC004528.2		AC005730.2	AC004552.1
ANTXR1	AC004542.1		AC005746.1	AC004590.1
AOAH	AC004542.2		AC005753.1	AC004593.1
AP001092.1	AC004552.1		AC005776.1	AC004691.2
AP003481.1	AC004590.1		AC005776.2	AC004696.1
APBB1IP	AC004596.1		AC005828.1	AC004707.1
APLNR	AC004623.1		AC005828.6	AC004771.1
APOBEC3C	AC004691.2		AC005833.3	AC004771.2
APOBR	AC004696.1		AC005899.1	AC004771.4
APOC1	AC004707.1		AC006001.2	AC004805.1
APOE	AC004754.1		AC006001.3	AC004808.2
AQP1	AC004771.1		AC006001.4	AC004824.1
ARHGAP30	AC004771.2		AC006019.1	AC004830.1
ARHGAP31	AC004771.4		AC006019.3	AC004832.3
ARHGAP31-AS1	AC004792.1		AC006023.2	AC004893.1
ARHGEF6	AC004805.1		AC006042.3	AC004951.2
ASF1B	AC004817.4		AC006058.3	AC004951.3
ASIC4	AC004824.1		AC006059.1	AC004951.4
ATOH8	AC004830.1		AC006064.1	AC004987.2
ATP6V1B1	AC004832.3		AC006064.5	AC004997.1
B3GNT10	AC004846.2		AC006122.1	AC005000.1
BCAN	AC004951.2		AC006141.1	AC005020.2
BCHE	AC004951.3		AC006160.1	AC005042.1
BEST3	AC004951.4		AC006213.3	AC005062.1
BIRC5	AC004980.3		AC006330.1	AC005072.1
BMF	AC004987.2		AC006355.1	AC005104.1
BMP2	AC004997.1		AC006480.2	AC005154.2
BTBD17	AC005000.1		AC006518.1	AC005154.6
BTK	AC005009.2		AC006518.2	AC005230.1
C1orf226	AC005013.1		AC006539.2	AC005253.2
C1orf94	AC005020.2		AC006600.2	AC005258.1
C1QA	AC005021.1		AC006960.3	AC005262.2
C1QB	AC005037.1		AC006994.1	AC005277.1
C1QC	AC005062.1		AC007012.2	AC005306.1
C1QL1	AC005091.1		AC007036.1	AC005324.4
C1QL4	AC005104.1		AC007038.1	AC005329.1
C21orf62	AC005154.4		AC007064.2	AC005329.2
C2orf88	AC005154.6		AC007066.1	AC005332.3
C3	AC005253.2		AC007151.1	AC005339.1
C3AR1	AC005258.1		AC007161.3	AC005481.1
C5orf38	AC005262.2		AC007216.3	AC005520.1
CA12	AC005277.1		AC007237.1	AC005534.1
CACNG4	AC005306.1		AC007256.1	AC005540.1
CALCRL	AC005324.4		AC007279.1	AC005544.2
CBX2	AC005329.1		AC007285.1	AC005559.1
CCDC160	AC005329.2		AC007318.2	AC005606.1
CCDC80	AC005329.3		AC007327.1	AC005614.2
CCL3	AC005336.2		AC007327.2	AC005670.2
CCL4	AC005339.1		AC007336.1	AC005696.2
CCL4L2	AC005363.1		AC007362.1	AC005697.1
CCNB2	AC005480.1		AC007431.3	AC005697.2
CCR1	AC005520.1		AC007494.1	AC005702.1
CD163	AC005520.5		AC007494.3	AC005726.1
CD24	AC005523.2		AC007496.1	AC005726.4
CD300C	AC005538.2		AC007496.2	AC005730.1
CD38	AC005540.1		AC007496.3	AC005730.3
CD44	AC005544.2		AC007533.1	AC005740.3
CD74	AC005559.1		AC007546.1	AC005740.4
CD82	AC005606.1		AC007551.2	AC005759.1
CD84	AC005606.2		AC007552.2	AC005775.1
CD86	AC005614.2		AC007559.1	AC005785.1
CD99	AC005670.2		AC007566.1	AC005785.2
CDC20	AC005696.2		AC007569.1	AC005786.3
CDC25A	AC005697.1		AC007608.1	AC005822.1
CDCA7	AC005697.2		AC007608.2	AC005828.2
CDK1	AC005702.1		AC007608.4	AC005828.7
CDKN2A	AC005726.1		AC007619.2	AC005832.4
CDKN2B	AC005726.2		AC007620.3	AC005833.2
CENPF	AC005726.3		AC007621.1	AC005837.2
CENPM	AC005726.4		AC007638.2	AC005839.1
CHD7	AC005726.5		AC007663.3	AC005840.1
CHI3L2	AC005740.3		AC007787.1	AC005841.1
CHST14	AC005759.1		AC007790.1	AC005842.1
CHST9	AC005775.1		AC007899.1	AC005871.2
CMKLR1	AC005785.1		AC007906.1	AC005884.1
CMTM3	AC005786.3		AC007954.1	AC005884.2
CNGA3	AC005789.1		AC007956.1	AC005899.3
COL8A2	AC005822.1		AC007996.1	AC005899.4
CPVL	AC005832.4		AC008038.1	AC005899.5
CPXM1	AC005833.2		AC008147.2	AC005899.7
CRISPLD1	AC005837.2		AC008267.4	AC005899.8
CRYAB	AC005840.1		AC008269.1	AC005912.1
CSF1	AC005841.1		AC008277.1	AC005921.2
CSF1R	AC005871.2		AC008443.5	AC005921.3
CSF2RA	AC005884.1		AC008481.2	AC005943.1
CSRP2	AC005884.2		AC008507.2	AC005943.2
CTGF	AC005899.3		AC008525.1	AC005944.1
CTSS	AC005899.4		AC008537.2	AC006017.1
CUTALP	AC005906.2		AC008537.4	AC006019.2
CX3CR1	AC005912.1		AC008555.6	AC006023.1
CXCL16	AC005921.2		AC008569.2	AC006030.1
CYBB	AC005943.1		AC008592.3	AC006064.4
CYP20A1	AC005943.2		AC008669.1	AC006111.1
CYTL1	AC005944.1		AC008676.1	AC006153.1
DAB2	AC006011.1		AC008743.1	AC006249.1
DAPL1	AC006017.1		AC008750.5	AC006270.3
DCX	AC006027.1		AC008771.1	AC006369.1
DDR1	AC006030.1		AC008781.3	AC006435.1
DHRS9	AC006064.2		AC008833.1	AC006435.2
DLL1	AC006064.4		AC008895.1	AC006441.3
DLL3	AC006111.1		AC008906.2	AC006449.3
DOCK2	AC006116.10		AC008957.2	AC006450.2
DOCK8	AC006116.7		AC008993.1	AC006450.3
DPYSL3	AC006128.1		AC009044.1	AC006461.1
DRAXIN	AC006146.1		AC009053.1	AC006486.1
EBI3	AC006153.1		AC009053.3	AC006504.1
ECM2	AC006213.1		AC009054.2	AC006538.2
EDA2R	AC006254.1		AC009063.3	AC006547.2
EDNRA	AC006369.1		AC009078.3	AC006547.3
EDNRB	AC006435.1		AC009090.4	AC006942.1
EEPD1	AC006435.2		AC009102.1	AC006946.1
EGFR	AC006441.3		AC009102.3	AC006970.1
EGR2	AC006449.3		AC009118.3	AC007000.2
EIF4EBP1	AC006449.7		AC009120.3	AC007009.1
ELN	AC006450.2		AC009145.4	AC007014.1
ETV1	AC006450.3		AC009152.1	AC007036.2
EYA1	AC006460.1		AC009166.2	AC007036.3
EZH2	AC006486.1		AC009227.1	AC007041.1
F2R	AC006504.7		AC009271.1	AC007182.2
F5	AC006538.2		AC009318.1	AC007191.1
FADS2	AC006547.2		AC009362.1	AC007192.1
FAM181B	AC006547.3		AC009365.3	AC007192.2
FAM222A	AC006942.1		AC009414.2	AC007216.4
FAM84B	AC006970.1		AC009554.1	AC007221.1
FBP1	AC006978.2		AC009630.1	AC007229.1
FCGBP	AC007009.1		AC009716.2	AC007238.1
FERMT1	AC007036.3		AC009948.1	AC007285.2
FHDC1	AC007041.1		AC009948.4	AC007298.1
FIBIN	AC007068.1		AC009951.1	AC007308.1
FLVCR2	AC007182.2		AC009961.1	AC007314.1
FOLR2	AC007192.1		AC010127.1	AC007318.1
FOXJ1	AC007192.2		AC010136.1	AC007344.1
FOXM1	AC007193.1		AC010157.1	AC007375.2
FPR3	AC007193.2		AC010186.3	AC007383.3
FRMPD3	AC007193.3		AC010287.1	AC007406.4
FYB1	AC007229.1		AC010378.1	AC007431.1
FZD7	AC007238.1		AC010469.2	AC007431.2
GADD45G	AC007283.1		AC010480.1	AC007494.2
GAL3ST4	AC007292.2		AC010531.5	AC007495.1
GALNT13	AC007298.1		AC010536.1	AC007527.2
GALNT15	AC007308.1		AC010538.1	AC007557.3
GAS1	AC007314.1		AC010615.2	AC007608.3
GBX2	AC007318.1		AC010632.2	AC007610.4
GFAP	AC007342.6		AC010680.2	AC007639.1
GINS3	AC007375.2		AC010680.4	AC007684.1
GLIPR2	AC007378.1		AC010975.2	AC007731.5
GPC2	AC007383.3		AC010975.3	AC007744.1
GPC6	AC007390.2		AC011196.1	AC007780.1
GPR17	AC007406.4		AC011379.2	AC007785.3
GPR34	AC007450.4		AC011451.1	AC007787.2
GRHL3	AC007527.2		AC011451.2	AC007878.1
GRID2	AC007560.1		AC011474.4	AC007881.1
GSX1	AC007563.2		AC011595.1	AC007922.3
HAPLN1	AC007620.2		AC011611.5	AC007938.3
HAS2	AC007666.1		AC011753.4	AC007952.4
HAS2-AS1	AC007688.1		AC011755.1	AC007969.1
HAVCR2	AC007731.5		AC011815.1	AC007998.2
HCLS1	AC007744.1		AC011815.3	AC008014.1
HES6	AC007780.1		AC011944.2	AC008026.1
HEY1	AC007785.3		AC012020.1	AC008026.3
HEY2	AC007849.2		AC012065.2	AC008073.3
HK2	AC007881.1		AC012085.2	AC008074.1
HLA-DMA	AC007922.3		AC012100.3	AC008105.1
HLA-DMB	AC007953.2		AC012150.1	AC008105.2
HLA-DOA	AC007969.1		AC012150.2	AC008121.3
HLA-DPA1	AC007998.2		AC012313.6	AC008124.1
HLA-DPB1	AC008026.1		AC012358.1	AC008133.1
HLA-DQA1	AC008067.1		AC012404.1	AC008134.1
HLA-DRA	AC008073.3		AC012404.2	AC008147.3
HLA-DRB1	AC008079.2		AC012443.1	AC008277.2
HLA-DRB5	AC008105.1		AC012447.1	AC008403.1
HMGN2P17	AC008105.2		AC012464.2	AC008403.2
HMX1	AC008105.3		AC012467.1	AC008429.2
HNMT	AC008126.1		AC012555.2	AC008440.2
HPGDS	AC008133.1		AC012603.1	AC008443.2
HPSE	AC008134.1		AC012613.2	AC008481.1
ID3	AC008264.2		AC012618.2	AC008481.3
ID4	AC008403.1		AC013290.1	AC008517.1
IFI44L	AC008403.2		AC013391.3	AC008537.1
IGFBP5	AC008429.2		AC013472.3	AC008537.3
IGFBPL1	AC008440.2		AC013553.2	AC008569.1
IGSF6	AC008443.1		AC015726.1	AC008575.1
IL17RD	AC008443.2		AC015727.1	AC008581.1
IL18	AC008481.3		AC015799.1	AC008635.1
IRF8	AC008522.1		AC015804.1	AC008655.1
IRX1	AC008525.2		AC015849.3	AC008676.2
IRX2	AC008537.1		AC015849.4	AC008686.1
IRX3	AC008569.1		AC015917.2	AC008731.1
ITGB2	AC008575.1		AC015922.3	AC008738.3
JADE3	AC008581.1		AC015936.1	AC008738.5
KCNN3	AC008635.1		AC015983.2	AC008738.7
KCNQ1	AC008655.1		AC016027.2	AC008750.4
KCTD11	AC008686.1		AC016027.3	AC008750.8
KIAA1211	AC008695.1		AC016144.1	AC008761.1
KIF11	AC008708.2		AC016394.2	AC008763.2
KIF15	AC008738.3		AC016397.1	AC008763.3
KIF18B	AC008738.5		AC016405.1	AC008764.1
KIF2C	AC008738.7		AC016542.2	AC008764.10
KIFC1	AC008741.1		AC016542.3	AC008764.3
KLHL13	AC008742.1		AC016582.2	AC008764.4
KLHL25	AC008750.4		AC016590.2	AC008764.9
KLRC2	AC008750.8		AC016597.1	AC008770.3
LAPTM5	AC008761.1		AC016705.2	AC008780.2
LCAT	AC008763.2		AC016745.2	AC008781.1
LDLRAD3	AC008763.3		AC016747.3	AC008870.1
LFNG	AC008764.1		AC016831.5	AC008870.2
LGALS3BP	AC008764.3		AC016876.3	AC008878.1
LHFPL3	AC008764.4		AC016909.2	AC008878.2
LILRB4	AC008770.2		AC016949.1	AC008878.4
LIMA1	AC008780.1		AC016954.1	AC008883.2
LINC00237	AC008780.2		AC017048.1	AC008914.1
LINC00511	AC008781.1		AC017099.1	AC008937.3
LINC00609	AC008870.1		AC018410.2	AC008945.1
LINC00836	AC008878.1		AC018557.2	AC008953.1
LINC00928	AC008878.2		AC018638.4	AC008957.1
LINC01088	AC008878.3		AC018638.8	AC008982.1
LINC01094	AC008878.4		AC018682.1	AC008985.1
LINC01235	AC008894.2		AC018695.4	AC008993.2
LINC01268	AC008914.1		AC018738.1	AC009032.1
LINC01338	AC008945.1		AC018797.3	AC009034.1
LINC01736	AC008982.1		AC018861.1	AC009052.1
LINC01918	AC008992.1		AC018926.3	AC009060.1
LINC02283	AC009019.1		AC019068.1	AC009061.2
LINC02381	AC009022.1		AC019072.1	AC009065.2
LIX1	AC009034.1		AC019080.4	AC009065.6
LMNB1	AC009052.1		AC019155.2	AC009065.7
LOXL2	AC009060.1		AC019257.2	AC009084.1
LPAR5	AC009065.1		AC020612.1	AC009084.2
LPL	AC009065.2		AC020612.3	AC009084.3
LRIG1	AC009065.5		AC020658.5	AC009086.3
LRP5	AC009065.6		AC020663.3	AC009087.1
LRRC17	AC009065.7		AC020699.1	AC009088.2
LRRC25	AC009084.1		AC020763.3	AC009107.2
LRRN1	AC009084.2		AC020915.5	AC009119.1
LUZP2	AC009084.3		AC020916.1	AC009133.1
LY86	AC009086.2		AC020916.2	AC009133.4
MAML2	AC009087.1		AC020917.1	AC009133.5
MARCH3	AC009088.2		AC020928.1	AC009133.6
MARCKS	AC009090.3		AC020951.1	AC009135.1
MASP1	AC009113.2		AC020978.1	AC009139.2
MATN2	AC009120.2		AC020978.9	AC009148.1
MCM2	AC009133.1		AC021231.3	AC009163.2
MCM5	AC009133.2		AC021739.3	AC009163.4
MDFI	AC009133.4		AC021739.5	AC009228.1
MEGF11	AC009133.5		AC021766.1	AC009234.1
MEX3A	AC009133.6		AC022001.2	AC009238.3
MFNG	AC009137.1		AC022001.3	AC009244.1
MIR181A2HG	AC009139.2		AC022022.1	AC009245.1
MIR219A1	AC009163.2		AC022022.2	AC009299.2
MIR25	AC009163.4		AC022034.2	AC009302.1
MIR331	AC009228.1		AC022080.1	AC009487.1
MIR3682	AC009238.3		AC022080.2	AC009487.3
MIR6071	AC009244.1		AC022080.3	AC009630.3
MIR621	AC009245.1		AC022113.1	AC009690.1
MIRLET7D	AC009299.2		AC022121.1	AC009690.2
MKI67	AC009302.1		AC022146.2	AC009690.3
MKRN3	AC009487.1		AC022272.1	AC009704.1
MMP14	AC009487.3		AC022400.2	AC009779.3
MMP2	AC009501.1		AC022447.2	AC009812.3
MPEG1	AC009511.1		AC022447.3	AC009927.1
MRC2	AC009511.2		AC022467.1	AC009948.3
MS4A4A	AC009630.3		AC022498.2	AC009948.5
MS4A6A	AC009690.1		AC022679.1	AC009955.4
MS4A7	AC009690.2		AC022679.2	AC009996.1
MSR1	AC009690.3		AC022826.1	AC010185.1
MSTN	AC009704.1		AC022898.1	AC010186.2
MTHFD2	AC009779.3		AC022919.1	AC010210.1
MYBL2	AC009955.3		AC022960.3	AC010240.2
MYC	AC009955.4		AC022973.2	AC010245.1
MYCL	AC010132.3		AC022973.3	AC010285.1
MYCN	AC010185.1		AC023051.1	AC010319.2
N4BP2	AC010230.1		AC023154.1	AC010320.2
NAPSB	AC010245.1		AC023389.2	AC010323.1
NCAPH	AC010273.1		AC023481.1	AC010326.2
NCK1-AS1	AC010319.2		AC023509.3	AC010327.5
NCKAP1L	AC010320.2		AC023509.5	AC010335.1
NES	AC010323.1		AC023575.1	AC010336.2
NEU4	AC010326.2		AC023632.2	AC010336.3
NFAM1	AC010327.5		AC023813.2	AC010336.4
NFIA-AS2	AC010335.1		AC023818.1	AC010336.5
NGFR	AC010336.2		AC023830.3	AC010336.6
NID1	AC010336.3		AC023906.5	AC010342.1
NKAIN4	AC010336.4		AC024075.3	AC010343.1
NMB	AC010336.5		AC024267.4	AC010422.3
NOG	AC010336.6		AC024270.1	AC010422.5
NOTCH1	AC010342.1		AC024270.4	AC010463.1
NOVA1-AS1	AC010343.1		AC024451.2	AC010468.1
NRM	AC010422.3		AC024451.4	AC010469.1
NRP2	AC010422.5		AC024558.1	AC010503.1
NTN1	AC010422.6		AC025031.4	AC010503.2
NUDT1	AC010463.1		AC025038.1	AC010531.1
NUSAP1	AC010468.1		AC025171.3	AC010531.7
OLFML2B	AC010503.1		AC025180.1	AC010536.3
OLFML3	AC010503.2		AC025265.1	AC010542.2
OLIG1	AC010522.1		AC025287.3	AC010542.3
OLIG2	AC010531.1		AC025678.3	AC010547.4
OSBPL11	AC010531.7		AC025809.2	AC010605.1
P2RY12	AC010536.3		AC026111.1	AC010619.1
P2RY13	AC010542.2		AC026124.2	AC010619.2
PABPC1	AC010542.3		AC026150.1	AC010624.2
PABPC5	AC010547.4		AC026304.1	AC010638.1
PBK	AC010605.1		AC026348.1	AC010646.1
PCDH15	AC010619.1		AC026391.1	AC010649.1
PCDHB9	AC010619.2		AC026398.1	AC010653.2
PCED1B-AS1	AC010624.2		AC026412.3	AC010680.3
PDCD4-AS1	AC010636.2		AC026461.3	AC010731.2
PDGFRA	AC010646.1		AC026471.1	AC010740.1
PGF	AC010649.1		AC026620.1	AC010761.1
PHLDA1	AC010653.2		AC026741.1	AC010761.3
PIK3R5	AC010655.2		AC026894.1	AC010761.5
PIRT	AC010655.3		AC026979.2	AC010834.3
PLPPR1	AC010655.4		AC027097.2	AC010857.1
PLVAP	AC010733.2		AC027279.1	AC010894.3
POU3F4	AC010761.1		AC027290.2	AC010931.3
PRLHR	AC010761.4		AC027312.1	AC010973.2
PRR11	AC010761.5		AC027335.1	AC010974.1
PRRX1	AC010768.1		AC027335.2	AC010975.1
PSTPIP1	AC010834.1		AC027348.1	AC010980.1
PTAFR	AC010857.1		AC027455.1	AC010997.6
PTGS1	AC010931.3		AC027514.1	AC010998.2
PTK7	AC010973.2		AC027514.2	AC011005.1
PTPRZ1	AC010976.2		AC027644.2	AC011120.1
PTTG1IP	AC010978.1		AC027682.1	AC011290.2
RASL12	AC010980.1		AC027682.7	AC011330.1
RCOR2	AC010980.2		AC027698.1	AC011365.2
RF01233	AC011005.1		AC027801.1	AC011373.1
RGS10	AC011330.1		AC034105.3	AC011406.1
RN7SL138P	AC011330.2		AC034223.1	AC011442.1
RNA5SP118	AC011365.2		AC037459.2	AC011446.1
RNA5SP283	AC011374.1		AC037487.1	AC011446.2
RNA5SP508	AC011445.1		AC040160.2	AC011447.1
RNASE6	AC011446.1		AC040934.1	AC011447.7
RNASEH2A	AC011446.2		AC046136.1	AC011448.1
RND2	AC011447.1		AC046158.1	AC011451.3
RNU6-1016P	AC011448.1		AC046158.3	AC011452.1
RNU6-277P	AC011452.1		AC048341.1	AC011455.2
RNU6-925P	AC011455.2		AC048344.4	AC011458.1
RP2	AC011462.1		AC051618.1	AC011462.1
RPE65	AC011466.1		AC051619.5	AC011466.4
RPL13A	AC011468.2		AC051619.8	AC011468.2
RPL18A	AC011472.3		AC053503.1	AC011472.3
RPL21	AC011473.2		AC055720.2	AC011473.2
RPL36A	AC011474.2		AC055811.3	AC011474.2
RPL7	AC011476.2		AC055855.2	AC011476.2
RPL7P38	AC011479.1		AC058791.1	AC011479.1
RPL9	AC011483.2		AC058822.1	AC011483.2
RPLP0	AC011484.1		AC058823.1	AC011484.1
RPS26	AC011495.1		AC063919.1	AC011495.1
RPS27	AC011495.2		AC063944.1	AC011495.2
RPS28	AC011495.3		AC063944.3	AC011500.3
RPS4XP22	AC011497.2		AC064801.2	AC011511.1
RRM2	AC011498.4		AC064807.1	AC011511.2
S100A10	AC011498.6		AC067750.1	AC011511.3
S1PR2	AC011499.1		AC067817.1	AC011530.1
SAMD9	AC011500.3		AC067852.3	AC011603.2
SAMSN1	AC011504.1		AC067931.1	AC011603.3
SASH3	AC011511.1		AC067931.2	AC011611.3
SCIN	AC011511.2		AC068025.1	AC011611.4
SCUBE2	AC011511.3		AC068152.1	AC011731.1
SELL	AC011511.4		AC068205.4	AC011742.3
SELPLG	AC011530.1		AC068535.1	AC011816.2
SEMA3D	AC011558.1		AC068547.1	AC011825.2
SEMA5A	AC011603.2		AC068587.3	AC011900.1
SERINC5	AC011603.3		AC068620.1	AC011921.3
SFRP2	AC011611.3		AC068631.2	AC011933.2
SFRP4	AC011731.1		AC068631.3	AC011933.4
SHD	AC011933.1		AC068643.1	AC011939.2
SIGLEC10	AC011939.3		AC068733.3	AC011944.1
SIGLEC14	AC011944.1		AC068790.3	AC011979.1
SIGLEC8	AC011979.1		AC068790.4	AC011995.2
SINHCAF	AC012065.4		AC068790.5	AC012065.5
SIX1	AC012065.5		AC068790.7	AC012085.1
SLA	AC012066.1		AC069228.1	AC012157.1
SLC12A4	AC012085.1		AC069236.1	AC012170.1
SLC1A5	AC012157.1		AC069360.1	AC012184.1
SLC37A2	AC012170.2		AC069431.2	AC012184.2
SLC51B	AC012170.3		AC069547.1	AC012254.1
SLC6A9	AC012173.1		AC073052.1	AC012254.2
SLC7A7	AC012184.1		AC073109.1	AC012309.2
SMOC1	AC012184.2		AC073349.2	AC012321.1
SNCAIP	AC012254.1		AC073389.1	AC012354.2
SOX11	AC012254.2		AC073410.2	AC012358.3
SOX2	AC012254.3		AC073413.1	AC012363.1
SOX3	AC012309.1		AC073439.1	AC012366.1
SOX4	AC012309.2		AC073476.3	AC012414.5
SOX6	AC012313.3		AC073569.1	AC012513.2
SOX8	AC012313.7		AC073569.3	AC012615.2
SPARC	AC012321.1		AC073591.1	AC012615.3
SPC25	AC012354.2		AC073592.1	AC012615.5
SPINK8	AC012363.1		AC073592.3	AC012640.4
SPON1	AC012366.1		AC073592.5	AC012645.3
SPSB4	AC012588.1		AC073592.6	AC012651.1
SRBD1	AC012615.2		AC073636.1	AC012676.5
SRPX	AC012615.3		AC073651.1	AC013262.1
ST7-AS1	AC012615.5		AC073655.2	AC013356.2
STC2	AC012617.1		AC073878.1	AC013356.4
STK32A	AC012618.1		AC073896.4	AC013429.2
STK32A-AS1	AC012640.4		AC073941.1	AC013467.2
STON1	AC012645.3		AC074138.1	AC013488.1
SULF2	AC012651.1		AC074194.1	AC013489.1
SULT1C4	AC012676.1		AC074286.1	AC013489.3
SUSD3	AC013262.1		AC074367.1	AC013549.2
SYK	AC013356.2		AC074387.1	AC013643.3
SYT6	AC013356.4		AC078778.1	AC015660.1
SYTL4	AC013394.1		AC078789.1	AC015674.1
TAGAP	AC013489.1		AC078846.1	AC015688.5
TBX2-AS1	AC013489.3		AC078882.1	AC015688.7
TBXAS1	AC013643.2		AC079061.1	AC015712.2
TCF12	AC015468.3		AC079316.1	AC015712.7
TCF19	AC015563.2		AC079331.2	AC015726.3
TCF3	AC015674.1		AC079385.2	AC015813.2
TCF7L1	AC015688.5		AC079411.2	AC015849.6
TFAP2A-AS1	AC015688.7		AC079416.1	AC015883.1
TGFBI	AC015712.2		AC079601.2	AC015959.1
TIMELESS	AC015712.7		AC079781.2	AC015961.2
TIMP4	AC015813.2		AC079866.2	AC016168.2
TJP2	AC015813.5		AC079915.1	AC016586.1
TLR3	AC015849.6		AC080188.2	AC016588.1
TLR7	AC015912.1		AC083806.2	AC016596.2
TMEM100	AC015961.2		AC083843.3	AC016700.2
TMEM119	AC015971.1		AC083862.1	AC016716.1
TMEM156	AC016026.1		AC083864.2	AC016734.1
TMEM255A	AC016027.1		AC084082.1	AC016738.1
TMEM37	AC016168.2		AC084337.1	AC016739.1
TMEM45A	AC016588.1		AC084783.1	AC016745.1
TMIGD3	AC016590.1		AC084824.3	AC016747.4
TMSB15A	AC016596.2		AC084871.1	AC016769.1
TNC	AC016629.1		AC084871.2	AC016825.1
TNFAIP8L2	AC016629.2		AC084880.1	AC016876.2
TNFRSF12A	AC016700.2		AC084880.3	AC016888.1
TNFRSF13C	AC016722.2		AC087203.1	AC017071.1
TNFRSF19	AC016734.1		AC087203.2	AC017076.1
TOP2A	AC016738.1		AC087284.1	AC017083.2
TOX3	AC016739.1		AC087286.2	AC017083.3
TP53	AC016747.4		AC087286.4	AC017116.1
TPTEP1	AC016769.1		AC087294.1	AC018358.1
TPX2	AC016825.1		AC087392.1	AC018362.2
TRAPPC13P1	AC016831.1		AC087500.2	AC018475.1
TREM2	AC016876.2		AC087501.2	AC018512.1
TSKU	AC016888.1		AC087521.2	AC018521.1
TSPAN11	AC017076.1		AC087641.1	AC018521.2
TSPAN12	AC017083.2		AC087749.2	AC018521.4
TSPAN6	AC017083.3		AC087821.1	AC018523.2
TYROBP	AC017116.1		AC087893.1	AC018557.1
UBE2C	AC018358.1		AC089984.2	AC018616.1
UCP2	AC018362.1		AC089998.3	AC018628.1
UHRF1	AC018362.2		AC089999.2	AC018630.2
USH1C	AC018463.1		AC090018.1	AC018638.7
UST	AC018475.1		AC090114.3	AC018659.2
VAMP8	AC018511.2		AC090220.1	AC018688.1
VANGL2	AC018512.1		AC090241.1	AC018697.1
VAX2	AC018521.1		AC090386.2	AC018730.2
VCAM1	AC018521.2		AC090519.1	AC018761.2
VCAN	AC018521.4		AC090519.2	AC018761.4
VEPH1	AC018523.2		AC090541.1	AC018766.1
VSIG4	AC018557.1		AC090543.1	AC018804.1
WDFY4	AC018616.1		AC090568.2	AC018809.2
WDR49	AC018630.2		AC090625.1	AC018816.1
WDR5B	AC018635.1		AC090692.1	AC018861.2
WEE1	AC018761.2		AC090739.1	AC018946.1
WSCD1	AC018761.4		AC090948.2	AC019070.1
ZNF300	AC018766.1		AC090950.1	AC019080.1
ZNF311	AC018804.1		AC090950.2	AC019171.1
ZNF93	AC018816.1		AC091059.2	AC019226.1
	AC018868.1		AC091132.1	AC019349.1
	AC019097.1		AC091132.5	AC020651.1
	AC019171.1		AC091180.2	AC020659.2
	AC019349.1		AC091231.1	AC020661.3
	AC020558.1		AC091516.1	AC020688.1
	AC020651.1		AC091805.1	AC020728.1
	AC020656.1		AC091885.2	AC020741.1
	AC020659.2		AC091946.2	AC020763.4
	AC020688.1		AC091948.1	AC020904.2
	AC020763.4		AC091959.2	AC020904.3
	AC020900.1		AC092042.3	AC020907.2
	AC020904.2		AC092068.3	AC020909.3
	AC020904.3		AC092120.2	AC020910.3
	AC020907.2		AC092123.1	AC020910.6
	AC020907.5		AC092127.1	AC020913.1
	AC020909.1		AC092139.2	AC020913.2
	AC020909.2		AC092139.3	AC020915.1
	AC020909.3		AC092145.1	AC020922.2
	AC020913.1		AC092164.1	AC020931.1
	AC020913.2		AC092171.1	AC020934.1
	AC020915.1		AC092171.2	AC020934.2
	AC020922.2		AC092279.1	AC020978.2
	AC020931.1		AC092332.1	AC020978.8
	AC020934.1		AC092431.2	AC021087.3
	AC020934.2		AC092641.1	AC021097.1
	AC020978.2		AC092653.1	AC021205.1
	AC020978.5		AC092658.1	AC021205.3
	AC020978.7		AC092666.1	AC021231.1
	AC021078.1		AC092681.2	AC021231.2
	AC021092.1		AC092691.1	AC021660.2
	AC021097.1		AC092691.2	AC022001.1
	AC021224.1		AC092691.3	AC022075.1
	AC021231.2		AC092718.4	AC022150.4
	AC021660.2		AC092718.7	AC022201.2
	AC021739.4		AC092720.2	AC022211.1
	AC022028.2		AC092745.1	AC022294.1
	AC022154.1		AC092801.1	AC022336.2
	AC022167.1		AC092828.1	AC022384.1
	AC022167.2		AC092835.1	AC022395.1
	AC022201.2		AC092839.2	AC022400.1
	AC022211.4		AC092868.2	AC022400.3
	AC022336.2		AC092881.1	AC022400.6
	AC022382.1		AC092902.1	AC022400.8
	AC022384.1		AC092910.2	AC022400.9
	AC022400.1		AC092958.1	AC022447.1
	AC022400.3		AC093156.1	AC022447.4
	AC022400.6		AC093278.2	AC022559.1
	AC022400.8		AC093330.2	AC022601.1
	AC022400.9		AC093367.1	AC022613.2
	AC022509.1		AC093388.1	AC022613.3
	AC022558.3		AC093422.1	AC022726.2
	AC022559.1		AC093525.4	AC022826.2
	AC022601.1		AC093567.1	AC022868.1
	AC022826.2		AC093620.1	AC022893.2
	AC022868.1		AC093673.2	AC022898.2
	AC022893.2		AC093690.1	AC022966.1
	AC022960.2		AC093849.1	AC022968.1
	AC022966.1		AC093879.2	AC022973.1
	AC022968.1		AC095059.1	AC022973.4
	AC022973.4		AC096576.1	AC023043.1
	AC023024.1		AC096576.2	AC023055.1
	AC023043.1		AC096576.3	AC023090.2
	AC023055.1		AC096713.1	AC023157.1
	AC023157.1		AC097376.2	AC023157.2
	AC023157.2		AC097488.1	AC023206.1
	AC023161.2		AC097537.1	AC023271.1
	AC023355.1		AC097658.1	AC023389.1
	AC023509.1		AC097662.1	AC023509.1
	AC023509.2		AC098484.1	AC023512.1
	AC023510.1		AC098484.2	AC023590.1
	AC023512.1		AC098484.3	AC023644.1
	AC023644.1		AC098487.1	AC023906.3
	AC023906.3		AC098587.1	AC023908.2
	AC023906.4		AC098614.4	AC023946.1
	AC023908.2		AC098617.1	AC024145.1
	AC023946.1		AC098850.1	AC024267.5
	AC024267.6		AC099494.2	AC024270.3
	AC024270.3		AC099521.2	AC024293.1
	AC024293.1		AC099689.1	AC024451.1
	AC024592.3		AC099754.1	AC024475.1
	AC024909.2		AC099792.1	AC024592.3
	AC025043.1		AC099811.4	AC024909.2
	AC025048.6		AC099811.5	AC025031.5
	AC025165.1		AC100763.1	AC025034.1
	AC025165.2		AC100788.1	AC025043.1
	AC025165.3		AC100793.1	AC025048.6
	AC025198.1		AC100800.1	AC025165.1
	AC025253.1		AC100814.1	AC025165.2
	AC025257.1		AC100821.1	AC025165.3
	AC025259.1		AC100830.2	AC025171.1
	AC025259.3		AC102953.1	AC025171.2
	AC025262.3		AC103591.3	AC025171.4
	AC025263.2		AC103703.1	AC025186.1
	AC025283.2		AC103739.1	AC025257.1
	AC025287.1		AC103810.1	AC025259.1
	AC025370.1		AC103810.3	AC025263.2
	AC025423.2		AC103831.1	AC025263.3
	AC025423.4		AC103853.1	AC025287.1
	AC025576.1		AC103853.2	AC025370.1
	AC025682.1		AC104058.1	AC025576.1
	AC026271.1		AC104083.1	AC026150.3
	AC026271.4		AC104088.1	AC026271.1
	AC026362.1		AC104090.1	AC026356.1
	AC026369.1		AC104115.2	AC026356.2
	AC026369.2		AC104117.1	AC026362.1
	AC026401.1		AC104389.4	AC026362.2
	AC026403.1		AC104446.1	AC026369.2
	AC026410.3		AC104452.1	AC026403.1
	AC026427.1		AC104596.1	AC026410.3
	AC026461.1		AC104651.2	AC026461.1
	AC026462.1		AC104781.1	AC026464.1
	AC026464.1		AC104791.1	AC026464.2
	AC026464.2		AC104794.2	AC026464.3
	AC026464.3		AC104806.1	AC026464.4
	AC026464.4		AC104819.1	AC026785.2
	AC026771.1		AC104836.1	AC026790.1
	AC026785.2		AC104964.2	AC026888.1
	AC026786.1		AC104984.3	AC026954.2
	AC026790.1		AC104985.3	AC026954.3
	AC026954.2		AC104986.1	AC027018.1
	AC026954.3		AC105001.1	AC027117.1
	AC027277.1		AC105074.1	AC027277.1
	AC027290.1		AC105129.1	AC027279.2
	AC027309.1		AC105129.3	AC027279.4
	AC027309.2		AC105150.1	AC027290.1
	AC027319.1		AC105233.3	AC027309.1
	AC027451.1		AC105402.3	AC027309.2
	AC027601.1		AC105429.2	AC027319.1
	AC027601.4		AC106739.1	AC027451.1
	AC027612.3		AC106800.2	AC027544.1
	AC027682.2		AC106869.1	AC027601.1
	AC027682.3		AC106873.1	AC027682.2
	AC027682.5		AC106881.1	AC027682.3
	AC027796.3		AC107072.2	AC027682.5
	AC034102.1		AC107294.2	AC027763.1
	AC034102.2		AC107884.1	AC027796.1
	AC034102.4		AC107890.1	AC034102.1
	AC034102.5		AC107952.2	AC034102.2
	AC034102.6		AC108062.1	AC034102.4
	AC034228.3		AC108102.1	AC034102.5
	AC034236.1		AC108161.1	AC034228.3
	AC036103.1		AC108471.1	AC034231.1
	AC036108.2		AC108673.2	AC034236.1
	AC036214.3		AC108693.1	AC036103.1
	AC037459.1		AC108704.2	AC036108.2
	AC037459.3		AC108724.2	AC036214.2
	AC037459.4		AC109439.2	AC036214.3
	AC040162.1		AC110296.1	AC037198.1
	AC040162.3		AC110491.3	AC037459.1
	AC040977.2		AC110769.2	AC037459.4
	AC044787.1		AC110769.3	AC037487.2
	AC044802.2		AC110792.2	AC040162.3
	AC044849.1		AC110794.1	AC040169.3
	AC044860.1		AC110921.1	AC040896.1
	AC046176.1		AC112196.1	AC040977.2
	AC046185.1		AC112220.4	AC044781.1
	AC048338.1		AC112497.1	AC044787.1
	AC048382.6		AC112673.1	AC044802.2
	AC051619.6		AC112694.1	AC044849.1
	AC053481.2		AC112694.2	AC046158.2
	AC053503.4		AC112907.2	AC046158.4
	AC055811.1		AC113155.1	AC046176.1
	AC055811.2		AC113208.1	AC046185.1
	AC055860.1		AC113349.1	AC048338.1
	AC055876.2		AC113385.1	AC048380.2
	AC055876.3		AC113398.2	AC053503.4
	AC060780.1		AC114316.2	AC053513.1
	AC062028.1		AC114402.2	AC055733.1
	AC064799.1		AC114495.2	AC055811.2
	AC066612.2		AC114546.2	AC055860.1
	AC066613.2		AC114956.3	AC055876.3
	AC067773.1		AC114980.1	AC060773.1
	AC067852.1		AC115618.2	AC061709.2
	AC067930.2		AC115618.3	AC062028.1
	AC067930.5		AC115837.1	AC063950.1
	AC067930.6		AC116158.1	AC063955.1
	AC067942.2		AC116347.1	AC064799.1
	AC067945.3		AC116353.4	AC066612.2
	AC067968.1		AC116407.4	AC066613.2
	AC067969.1		AC116651.1	AC067773.1
	AC067969.2		AC117500.2	AC067852.1
	AC068385.1		AC118344.1	AC067852.4
	AC068522.1		AC118658.2	AC067930.2
	AC068533.4		AC119674.1	AC067930.5
	AC068580.3		AC120349.3	AC067930.6
	AC068580.4		AC122707.1	AC067942.2
	AC068724.1		AC122710.2	AC067945.3
	AC068775.1		AC124283.3	AC067969.1
	AC068790.8		AC124283.4	AC067969.2
	AC068831.1		AC124312.2	AC068025.2
	AC068831.4		AC124319.2	AC068313.1
	AC068896.1		AC124319.4	AC068385.1
	AC068987.2		AC124944.3	AC068389.4
	AC069120.1		AC126389.1	AC068481.1
	AC069234.2		AC126768.2	AC068506.1
	AC069234.3		AC126773.4	AC068533.4
	AC069257.3		AC127024.3	AC068580.3
	AC069281.2		AC127024.8	AC068580.4
	AC069287.2		AC127522.1	AC068587.4
	AC069368.1		AC129502.1	AC068620.3
	AC069503.1		AC129908.1	AC068669.1
	AC069503.2		AC130324.1	AC068790.2
	AC072022.1		AC130472.1	AC068790.8
	AC073052.2		AC130651.1	AC068831.1
	AC073167.1		AC130895.1	AC068831.4
	AC073254.1		AC131097.2	AC068987.2
	AC073261.1		AC131212.3	AC069234.1
	AC073283.3		AC131392.1	AC069234.2
	AC073333.1		AC131571.1	AC069234.3
	AC073349.1		AC132938.5	AC069257.3
	AC073365.1		AC133473.1	AC069281.2
	AC073508.2		AC134349.2	AC069287.2
	AC073525.1		AC134407.1	AC069366.1
	AC073548.1		AC134407.2	AC069368.1
	AC073573.1		AC134878.2	AC069503.1
	AC073610.2		AC135507.2	AC069503.2
	AC073610.3		AC136603.1	AC073052.2
	AC073611.1		AC136604.3	AC073254.1
	AC073612.1		AC137894.1	AC073283.3
	AC073641.1		AC137932.2	AC073333.1
	AC073861.1		AC138393.3	AC073410.1
	AC073863.1		AC138409.1	AC073413.2
	AC073864.1		AC138409.2	AC073487.1
	AC073869.3		AC138627.1	AC073508.2
	AC073896.1		AC138655.1	AC073548.1
	AC073896.2		AC138761.1	AC073573.1
	AC073896.5		AC138951.1	AC073592.7
	AC073957.2		AC138951.2	AC073610.3
	AC074050.3		AC139256.1	AC073611.1
	AC074091.1		AC139491.5	AC073612.1
	AC074134.1		AC139495.3	AC073641.1
	AC074143.1		AC139697.1	AC073861.1
	AC074212.1		AC139713.2	AC073863.1
	AC078795.1		AC139792.1	AC073864.1
	AC078795.2		AC139792.3	AC073869.3
	AC078795.3		AC139887.2	AC073896.1
	AC078817.1		AC139887.4	AC073896.5
	AC078819.1		AC140076.1	AC073957.2
	AC078899.1		AC141557.1	AC074050.3
	AC078909.1		AC141586.5	AC074091.1
	AC078927.1		AC145285.1	AC074135.1
	AC079150.2		AC145423.3	AC078778.2
	AC079228.1		AC145676.1	AC078795.3
	AC079250.1		AC146507.2	AC078817.1
	AC079328.2		AC211476.2	AC078819.1
	AC079329.1		AC211486.2	AC078842.2
	AC079341.1		AC233296.1	AC078899.1
	AC079385.3		AC234772.3	AC078927.1
	AC079447.1		AC234775.3	AC079117.1
	AC079594.2		AC239798.4	AC079145.1
	AC079601.1		AC239803.2	AC079209.2
	AC079742.1		AC239868.1	AC079228.1
	AC079766.1		AC241520.1	AC079250.1
	AC079776.1		AC241585.1	AC079296.1
	AC079780.1		AC242842.1	AC079305.3
	AC079921.1		AC243732.1	AC079316.2
	AC079922.1		AC243829.4	AC079328.2
	AC079944.2		AC243836.1	AC079329.1
	AC080013.1		AC243964.3	AC079331.1
	AC080023.2		AC244033.1	AC079385.1
	AC080078.2		AC244090.1	AC079416.2
	AC083798.2		AC244093.2	AC079447.1
	AC083809.1		AC244093.4	AC079594.2
	AC083862.2		AC244517.12	AC079601.1
	AC083873.1		AC244517.7	AC079742.1
	AC083899.1		AC245060.2	AC079780.1
	AC084018.2		AC245060.6	AC079781.1
	AC084024.3		AC245100.2	AC079866.1
	AC084125.1		AC245100.4	AC079880.2
	AC084125.2		AC245297.3	AC079922.1
	AC084125.4		AC245884.3	AC080023.2
	AC084756.1		ACAA2	AC080128.1
	AC084768.2		ACADS	AC083798.1
	AC084855.1		ACAT2	AC083805.2
	AC084866.1		ACHE	AC083873.1
	AC084876.1		ACKR1	AC083899.1
	AC087163.3		ACKR4	AC084024.3
	AC087164.1		ACOT1	AC084125.1
	AC087164.2		ACOT11	AC084125.4
	AC087190.1		ACOT4	AC084756.1
	AC087190.3		ACOT7	AC084768.2
	AC087203.3		ACSBG1	AC087164.1
	AC087276.2		ACSS3	AC087164.2
	AC087289.1		ACTBP7	AC087190.3
	AC087289.3		ACTG1P1	AC087222.1
	AC087289.4		ACTG1P10	AC087289.3
	AC087292.1		ACTL6B	AC087289.4
	AC087343.1		ACTR1B	AC087292.1
	AC087362.1		ACYP1	AC087362.1
	AC087393.2		ADAM20	AC087392.3
	AC087439.1		ADAM20P1	AC087393.2
	AC087442.1		ADAM21	AC087439.1
	AC087623.4		ADAMTS5	AC087442.1
	AC087897.1		ADAMTS6	AC087749.1
	AC089999.1		ADAMTS9-AS1	AC087821.2
	AC090004.1		ADAMTSL4	AC089999.1
	AC090114.1		ADGRB2	AC090004.1
	AC090181.1		ADORA1	AC090114.1
	AC090227.1		ADRA1A	AC090181.2
	AC090236.1		ADRA1B	AC090181.3
	AC090281.1		ADRA2C	AC090227.1
	AC090498.1		ADRM1	AC090236.1
	AC090510.1		AES	AC090281.1
	AC090510.3		AF001548.2	AC090498.1
	AC090527.2		AF067845.2	AC090510.2
	AC090543.2		AF117829.1	AC090527.2
	AC090589.1		AF127577.6	AC090559.2
	AC090607.1		AF127936.2	AC090589.1
	AC090607.4		AF131215.1	AC090607.2
	AC090617.3		AF131215.3	AC090607.4
	AC090772.3		AF131215.5	AC090617.3
	AC090772.4		AFAP1-AS1	AC090695.1
	AC090907.2		AGAP1-IT1	AC090740.1
	AC090971.1		AGAP2	AC090772.3
	AC090984.1		AGAP3	AC090772.4
	AC091042.1		AGO3	AC090907.2
	AC091045.1		AGPAT2	AC090984.1
	AC091053.1		AHSA1	AC091042.1
	AC091057.1		AIG1P1	AC091045.1
	AC091057.2		AIP	AC091057.2
	AC091059.1		AJM1	AC091059.1
	AC091117.1		AK1	AC091078.1
	AC091133.1		AK3P5	AC091078.3
	AC091153.1		AKAP9	AC091117.1
	AC091153.4		AKR1B1P3	AC091132.4
	AC091167.1		AKT3-IT1	AC091133.1
	AC091167.2		AL008721.2	AC091153.1
	AC091167.6		AL008729.1	AC091153.4
	AC091180.3		AL021068.1	AC091167.2
	AC091230.1		AL021368.2	AC091167.4
	AC091390.4		AL022068.1	AC091167.6
	AC091429.1		AL022157.1	AC091180.3
	AC091492.1		AL022313.4	AC091181.1
	AC091551.1		AL022323.2	AC091230.1
	AC091564.2		AL022328.4	AC091286.1
	AC091564.3		AL022329.1	AC091429.1
	AC091564.4		AL023284.2	AC091492.1
	AC091564.6		AL023284.4	AC091551.1
	AC091887.1		AL023807.1	AC091564.2
	AC091959.3		AL031009.1	AC091564.3
	AC092017.2		AL031587.1	AC091564.4
	AC092045.1		AL031587.4	AC091564.6
	AC092069.1		AL031594.1	AC091885.1
	AC092073.1		AL031651.2	AC091887.1
	AC092115.1		AL031666.1	AC092017.2
	AC092115.2		AL031666.3	AC092045.1
	AC092115.3		AL031667.3	AC092069.1
	AC092118.2		AL031710.2	AC092073.1
	AC092134.1		AL031716.1	AC092111.2
	AC092139.1		AL031717.1	AC092115.1
	AC092140.1		AL031847.1	AC092115.2
	AC092143.1		AL033519.1	AC092115.3
	AC092143.2		AL034397.3	AC092117.2
	AC092143.3		AL034405.1	AC092118.2
	AC092155.2		AL034418.1	AC092127.2
	AC092301.1		AL049646.1	AC092134.1
	AC092329.1		AL049647.1	AC092135.3
	AC092368.3		AL049780.3	AC092143.1
	AC092378.1		AL049820.1	AC092143.2
	AC092471.2		AL049830.4	AC092143.3
	AC092567.1		AL049835.1	AC092155.2
	AC092587.1		AL049840.1	AC092162.2
	AC092597.1		AL049840.5	AC092192.1
	AC092620.2		AL049844.2	AC092279.2
	AC092647.5		AL049875.1	AC092329.1
	AC092681.3		AL078459.1	AC092364.2
	AC092683.1		AL078601.2	AC092471.2
	AC092683.2		AL078605.1	AC092567.1
	AC092718.3		AL078644.2	AC092574.2
	AC092745.3		AL078645.1	AC092587.1
	AC092809.3		AL079343.1	AC092597.1
	AC092809.4		AL080250.1	AC092634.3
	AC092849.1		AL080317.2	AC092647.5
	AC092849.2		AL096855.1	AC092653.2
	AC092953.2		AL096855.2	AC092798.1
	AC093110.1		AL109811.2	AC092800.1
	AC093155.3		AL109838.1	AC092802.2
	AC093305.1		AL110115.1	AC092809.3
	AC093330.1		AL117339.4	AC092849.1
	AC093423.3		AL117381.1	AC092849.2
	AC093484.1		AL118505.1	AC092902.2
	AC093484.3		AL118556.2	AC092910.1
	AC093495.1		AL118558.2	AC092910.3
	AC093503.2		AL121601.2	AC092944.1
	AC093512.1		AL121672.1	AC092953.2
	AC093525.1		AL121759.2	AC092967.1
	AC093525.2		AL121772.2	AC093155.3
	AC093525.5		AL121772.3	AC093330.1
	AC093525.6		AL121820.2	AC093414.1
	AC093591.1		AL121832.3	AC093423.3
	AC093591.2		AL121890.2	AC093484.3
	AC093616.1		AL121900.1	AC093503.2
	AC093668.1		AL121908.1	AC093512.1
	AC093668.2		AL121952.1	AC093525.1
	AC093809.1		AL121957.1	AC093525.10
	AC093827.2		AL121987.1	AC093525.2
	AC093890.1		AL132656.3	AC093525.7
	AC093899.2		AL132671.2	AC093525.9
	AC093909.1		AL132777.1	AC093591.1
	AC096536.3		AL132800.1	AC093591.2
	AC096586.1		AL132989.1	AC093627.5
	AC096636.1		AL133230.1	AC093668.1
	AC096677.1		AL133243.2	AC093752.2
	AC096677.2		AL133243.4	AC093788.1
	AC096772.1		AL133284.1	AC093809.1
	AC097263.1		AL133304.3	AC093827.2
	AC097382.2		AL133325.2	AC093843.1
	AC097460.1		AL133330.2	AC093879.1
	AC097468.2		AL133368.1	AC093899.2
	AC097478.1		AL133445.2	AC093908.1
	AC097515.1		AL133461.1	AC093909.1
	AC097523.1		AL135838.1	AC095059.2
	AC097533.1		AL135960.1	AC096536.3
	AC097534.1		AL135999.2	AC096586.1
	AC097637.1		AL136146.1	AC096636.1
	AC097641.1		AL136146.2	AC096677.2
	AC097641.2		AL136164.3	AC097103.2
	AC098591.1		AL136298.1	AC097263.1
	AC098591.2		AL136309.3	AC097359.2
	AC098679.1		AL136310.1	AC097382.2
	AC098850.3		AL136320.1	AC097468.2
	AC098850.4		AL136982.3	AC097478.1
	AC098934.3		AL136984.1	AC097515.1
	AC099329.1		AL136985.2	AC097533.1
	AC099329.3		AL137003.1	AC097637.1
	AC099336.2		AL137145.1	AC097641.1
	AC099508.1		AL137847.2	AC098591.1
	AC099518.3		AL138847.2	AC098591.2
	AC099518.5		AL138881.1	AC098850.3
	AC099560.2		AL139011.1	AC098850.4
	AC099668.1		AL139128.1	AC098934.3
	AC099677.1		AL139130.1	AC099329.1
	AC099811.2		AL139147.1	AC099329.3
	AC099850.2		AL139158.2	AC099336.1
	AC100778.3		AL139246.5	AC099336.2
	AC100786.2		AL139274.1	AC099494.1
	AC100791.3		AL139286.2	AC099494.3
	AC100793.2		AL139294.1	AC099508.1
	AC100793.3		AL139400.1	AC099518.3
	AC100827.3		AL157392.4	AC099560.2
	AC103681.1		AL157392.5	AC099804.1
	AC103681.2		AL157396.1	AC099811.1
	AC103691.2		AL157400.3	AC099811.2
	AC103740.1		AL157896.1	AC099811.6
	AC103810.8		AL157902.2	AC099850.2
	AC104002.3		AL157931.1	AC100774.1
	AC104024.2		AL157938.3	AC100778.3
	AC104072.1		AL158055.1	AC100786.2
	AC104109.3		AL158071.4	AC100788.2
	AC104109.4		AL158156.1	AC100793.2
	AC104116.1		AL158163.1	AC100793.3
	AC104117.2		AL158163.2	AC102945.2
	AC104134.1		AL158166.2	AC103681.1
	AC104151.1		AL158211.1	AC103705.1
	AC104316.1		AL158212.4	AC103726.1
	AC104365.3		AL158801.1	AC103810.2
	AC104390.1		AL159972.1	AC103810.5
	AC104532.1		AL160274.1	AC103923.1
	AC104563.1		AL160314.2	AC104002.3
	AC104581.2		AL160412.1	AC104024.2
	AC104581.4		AL161457.2	AC104072.1
	AC104655.1		AL161729.2	AC104109.3
	AC104699.1		AL161785.1	AC104109.4
	AC104758.2		AL161935.1	AC104116.1
	AC104794.4		AL162274.1	AC104134.1
	AC104938.1		AL162394.1	AC104332.1
	AC105001.2		AL162408.1	AC104350.1
	AC105020.2		AL162431.3	AC104365.3
	AC105020.4		AL162511.1	AC104383.1
	AC105020.6		AL162584.1	AC104390.1
	AC105036.3		AL162595.1	AC104447.1
	AC105052.1		AL353608.2	AC104532.1
	AC105052.3		AL353608.4	AC104563.1
	AC105052.4		AL353662.1	AC104564.5
	AC105250.1		AL353692.1	AC104581.2
	AC105339.2		AL353718.1	AC104651.1
	AC105446.1		AL353743.2	AC104655.1
	AC105940.2		AL353763.1	AC104699.1
	AC106707.1		AL353804.1	AC104758.2
	AC106760.1		AL353807.1	AC104791.2
	AC106760.2		AL354733.2	AC104794.4
	AC106782.7		AL354809.1	AC104827.1
	AC106795.1		AL354941.1	AC104938.1
	AC106800.1		AL354977.1	AC104964.1
	AC106864.1		AL355314.2	AC104964.3
	AC106872.2		AL355336.1	AC104982.1
	AC106886.2		AL355377.1	AC105001.2
	AC106886.4		AL355377.2	AC105020.1
	AC107032.1		AL355916.2	AC105020.2
	AC107075.1		AL355994.2	AC105020.4
	AC107081.2		AL355994.4	AC105020.6
	AC107373.2		AL356056.2	AC105036.3
	AC107871.1		AL356215.1	AC105052.1
	AC107959.1		AL356258.1	AC105052.3
	AC107983.1		AL356266.1	AC105052.4
	AC107983.2		AL356273.3	AC105053.1
	AC108002.2		AL356320.2	AC105101.1
	AC108449.1		AL356481.2	AC105235.1
	AC108449.3		AL356740.3	AC105429.1
	AC108451.2		AL356756.1	AC105446.1
	AC108479.1		AL356801.1	AC105760.2
	AC108488.2		AL356804.1	AC105910.1
	AC108516.2		AL357055.3	AC106707.1
	AC108693.2		AL357093.2	AC106760.1
	AC108863.1		AL357552.2	AC106760.2
	AC109460.2		AL357833.1	AC106791.1
	AC109460.3		AL357873.1	AC106872.2
	AC109460.4		AL358075.3	AC106886.2
	AC109587.1		AL358115.1	AC106886.4
	AC109992.1		AL358790.1	AC107032.1
	AC110015.1		AL359095.1	AC107075.1
	AC110275.1		AL359182.1	AC107081.2
	AC110285.4		AL359232.1	AC107214.1
	AC110491.1		AL359265.3	AC107373.2
	AC110597.3		AL359314.1	AC107983.1
	AC110619.1		AL359504.1	AC108002.2
	AC111200.2		AL359710.1	AC108010.1
	AC112191.2		AL359740.1	AC108063.1
	AC112211.1		AL359922.2	AC108215.1
	AC112247.1		AL359922.3	AC108449.2
	AC112491.1		AL360012.1	AC108451.2
	AC112503.1		AL360091.2	AC108471.2
	AC112907.3		AL360182.1	AC108479.1
	AC113189.2		AL365205.3	AC108516.2
	AC113189.3		AL365209.1	AC108688.1
	AC113189.4		AL365338.1	AC108693.2
	AC113208.3		AL365356.1	AC108863.1
	AC113398.1		AL390067.1	AC109326.1
	AC113404.3		AL390318.1	AC109460.3
	AC113935.1		AL390754.1	AC110015.1
	AC114271.1		AL390783.1	AC110079.2
	AC114488.2		AL391421.1	AC110275.1
	AC114490.2		AL391425.1	AC110285.1
	AC114491.1		AL391825.1	AC110285.3
	AC114546.3		AL391839.1	AC110285.4
	AC114728.1		AL391987.3	AC110491.1
	AC114730.1		AL391994.1	AC110597.1
	AC114730.2		AL441963.1	AC110799.1
	AC114801.3		AL442125.2	AC110813.1
	AC114803.1		AL442647.1	AC110994.1
	AC114947.2		AL445223.1	AC111170.3
	AC115223.1		AL445307.1	AC111200.2
	AC115284.1		AL445426.1	AC112191.2
	AC115676.1		AL445435.1	AC112211.1
	AC116049.1		AL445523.1	AC112491.1
	AC116533.1		AL445670.1	AC112503.1
	AC116903.1		AL445673.1	AC112512.1
	AC116913.1		AL445985.1	AC113143.1
	AC117382.1		AL449212.1	AC113189.2
	AC117457.1		AL449403.2	AC113189.4
	AC117498.1		AL450226.2	AC113398.1
	AC117503.1		AL450332.1	AC113404.3
	AC120057.2		AL450384.1	AC113935.1
	AC120057.3		AL450992.2	AC114402.1
	AC120114.3		AL451060.1	AC114491.1
	AC120114.5		AL451105.2	AC114546.3
	AC122108.1		AL451165.2	AC114728.1
	AC122718.1		AL512306.1	AC114730.1
	AC123768.3		AL512306.3	AC114760.2
	AC123768.4		AL512343.2	AC114801.3
	AC124066.1		AL512430.2	AC114803.1
	AC124068.1		AL512504.1	AC114947.2
	AC124283.1		AL512593.1	AC114982.2
	AC124303.2		AL512605.2	AC115223.1
	AC124312.1		AL512625.2	AC115284.1
	AC125257.2		AL513314.2	AC115621.1
	AC125388.1		AL513327.3	AC116049.1
	AC125494.1		AL513343.1	AC116348.4
	AC125611.3		AL513365.1	AC116533.1
	AC125616.1		AL513365.2	AC116903.1
	AC126696.2		AL513366.1	AC116913.1
	AC126755.1		AL513475.1	AC117457.1
	AC126755.2		AL513523.1	AC117498.1
	AC127455.1		AL583805.1	AC117503.1
	AC127459.1		AL583832.1	AC118344.2
	AC127459.3		AL589655.1	AC120057.2
	AC127496.4		AL589666.2	AC120057.3
	AC127496.6		AL589743.1	AC120114.1
	AC127502.2		AL589765.4	AC120114.3
	AC128687.2		AL589872.1	AC120114.4
	AC129492.3		AL589987.1	AC120114.5
	AC129492.7		AL590128.1	AC120349.2
	AC130304.1		AL590326.1	AC121251.1
	AC130324.3		AL590399.1	AC122108.1
	AC130343.1		AL590617.1	AC122129.1
	AC130456.5		AL590627.2	AC122718.2
	AC130462.1		AL590632.1	AC123567.2
	AC130689.1		AL590652.1	AC124283.1
	AC131206.1		AL590705.3	AC124312.1
	AC131238.1		AL590723.1	AC124312.3
	AC131953.1		AL590762.1	AC124312.6
	AC132217.1		AL590783.1	AC125257.2
	AC132825.1		AL591379.1	AC125388.1
	AC132872.3		AL591441.1	AC125611.3
	AC132872.4		AL591501.1	AC125612.1
	AC133134.1		AL591686.2	AC125616.1
	AC133550.1		AL591770.1	AC126696.2
	AC133555.4		AL591848.1	AC127024.2
	AC133555.5		AL591866.1	AC127024.4
	AC134312.1		AL591895.1	AC127070.4
	AC134312.3		AL591926.2	AC127164.1
	AC134312.4		AL591926.8	AC127455.1
	AC134349.1		AL592076.1	AC127459.1
	AC134407.3		AL592114.3	AC127459.3
	AC134669.1		AL592158.1	AC127496.6
	AC134772.1		AL592293.1	AC128687.2
	AC135048.1		AL592301.1	AC128689.1
	AC135048.2		AL604028.2	AC129492.3
	AC135050.1		AL606517.1	AC129492.7
	AC135050.2		AL606537.1	AC130304.1
	AC135050.7		AL627308.1	AC130352.1
	AC135178.2		AL627308.2	AC130456.5
	AC135279.2		AL627309.5	AC130689.1
	AC135457.1		AL645568.1	AC131009.4
	AC135507.1		AL645608.1	AC131206.1
	AC135586.2		AL645608.3	AC131212.2
	AC135731.1		AL662907.2	AC131888.1
	AC135977.1		AL670729.1	AC131934.1
	AC136469.2		AL671986.1	AC131971.1
	AC136632.1		AL683813.1	AC132217.1
	AC137499.1		AL683842.1	AC132825.1
	AC137590.1		AL731577.1	AC133134.1
	AC137630.1		AL731684.2	AC133555.4
	AC137630.2		AL732292.2	AC134312.4
	AC137630.3		AL807757.1	AC134669.1
	AC137630.4		AL807761.4	AC134772.1
	AC137834.1		AL831737.1	AC135048.1
	AC137932.3		AL928654.4	AC135048.2
	AC138028.3		AL928970.1	AC135050.2
	AC138035.1		AL954705.1	AC135050.7
	AC138150.1		ALDH1A1	AC135178.2
	AC138150.2		ALDH1A3	AC135279.2
	AC138305.3		ALDH2	AC135457.1
	AC138392.1		ALDH4A1	AC135507.1
	AC138430.1		ALDH7A1P2	AC135586.2
	AC138430.2		ALDOA	AC135977.1
	AC138466.4		ALDOC	AC136424.2
	AC138647.1		ALG10	AC136624.2
	AC138649.1		ALG10B	AC136632.1
	AC138649.4		ALKBH7	AC137055.1
	AC138696.1		ALMS1-IT1	AC137499.1
	AC138811.1		AMPH	AC137590.1
	AC138811.2		AMZ1	AC137630.1
	AC138819.1		ANAPC11	AC137630.2
	AC138866.1		ANAPC15	AC137630.3
	AC138894.1		ANGPTL2	AC137630.4
	AC138932.1		ANKAR	AC137834.1
	AC138956.1		ANKFN1	AC137932.1
	AC138969.1		ANKRD20A1	AC138028.3
	AC138969.2		ANKRD20A3	AC138150.2
	AC139256.2		ANKRD35	AC138207.8
	AC139272.1		ANKRD36	AC138392.1
	AC139426.1		ANKRD36C	AC138430.1
	AC139491.1		ANKRD44	AC138430.2
	AC139491.4		ANKRD65	AC138466.4
	AC139530.1		ANTXR1	AC138466.5
	AC139530.2		ANXA2P1	AC138649.1
	AC139713.1		ANXA2R	AC138649.4
	AC139769.2		ANXA3	AC138696.1
	AC139887.1		ANXA6	AC138811.1
	AC140125.2		ANXA7	AC138811.2
	AC140134.1		AP000266.1	AC138819.1
	AC140504.1		AP000350.5	AC138894.1
	AC141424.1		AP000350.6	AC138956.1
	AC141586.2		AP000365.1	AC139256.2
	AC141586.3		AP000437.1	AC139426.1
	AC142391.1		AP000462.1	AC139451.1
	AC144548.1		AP000462.3	AC139491.1
	AC145124.1		AP000547.3	AC139491.4
	AC145138.1		AP000560.1	AC139530.1
	AC145207.2		AP000641.1	AC139530.2
	AC145207.3		AP000786.1	AC139713.1
	AC145207.4		AP000787.1	AC139769.2
	AC145207.6		AP000844.1	AC140125.2
	AC145207.8		AP000852.1	AC140504.1
	AC145285.6		AP000857.1	AC141424.1
	AC146944.4		AP000866.2	AC141586.3
	AC148477.1		AP000866.3	AC142391.1
	AC148477.5		AP000925.1	AC144548.1
	AC148477.7		AP000941.1	AC145207.2
	AC159540.2		AP000943.2	AC145207.3
	AC190387.1		AP000962.1	AC145207.6
	AC211429.1		AP001020.2	AC145207.8
	AC211433.1		AP001021.2	AC148477.1
	AC211486.4		AP001033.2	AC148477.7
	AC226101.1		AP001102.1	AC190387.1
	AC231533.1		AP001160.2	AC211486.5
	AC231533.2		AP001172.2	AC226101.1
	AC231981.1		AP001284.1	AC231533.2
	AC233699.1		AP001429.1	AC231981.1
	AC233702.6		AP001469.2	AC233300.1
	AC233968.1		AP001486.2	AC233702.6
	AC233992.1		AP001505.1	AC233992.1
	AC233992.2		AP001554.1	AC233992.2
	AC234582.2		AP001767.3	AC234772.2
	AC234781.5		AP001767.4	AC234782.2
	AC234917.1		AP001816.1	AC234782.4
	AC239802.1		AP001885.1	AC234917.1
	AC239804.1		AP001972.5	AC239802.2
	AC239859.6		AP001978.1	AC239809.3
	AC239860.1		AP002373.2	AC239859.6
	AC239860.2		AP002381.1	AC239860.2
	AC241377.3		AP002439.1	AC241377.3
	AC241585.2		AP002478.2	AC243547.2
	AC241585.3		AP002495.1	AC243547.3
	AC242498.1		AP002759.1	AC243585.2
	AC243547.2		AP002812.1	AC243772.2
	AC243547.3		AP003025.2	AC243830.1
	AC243585.2		AP003072.2	AC243919.1
	AC243829.1		AP003072.5	AC243960.2
	AC243919.1		AP003108.1	AC244023.1
	AC243960.2		AP003108.4	AC244131.1
	AC243994.1		AP003392.1	AC244197.2
	AC244023.1		AP003392.2	AC244197.3
	AC244154.1		AP003392.4	AC244517.8
	AC244197.2		AP003419.2	AC245014.3
	AC244197.3		AP003467.2	AC245033.1
	AC244517.10		AP003486.1	AC245052.4
	AC244669.2		AP003696.1	AC245595.1
	AC245033.1		AP003784.1	AC245884.1
	AC245033.3		AP004289.1	AC246787.1
	AC245052.4		AP004782.1	AC246817.1
	AC245140.2		AP005060.1	AC253536.3
	AC245297.2		AP005131.1	AC253536.6
	AC245452.2		AP005131.2	ACAP1
	AC245595.1		AP005131.4	ACBD3-AS1
	AC245884.1		AP005136.2	ACP5
	AC246787.1		AP005212.4	ACTA1
	AC254562.2		AP005432.1	ACTBP2
	ACAD11		AP005433.1	ACTG1P18
	ACBD3-AS1		AP006259.1	ACVR2B
	ACTA1		AP1S1	AD000091.1
	ACTA2-AS1		AP2M1	AD000671.1
	ACTBP2		AP2S1	AD000671.2
	ACTG1P4		AP3S1	AD000671.3
	AD000091.1		AP4M1	AD001527.2
	AD000671.1		APBB1	ADAM11
	AD000671.2		APLP1	ADAM1B
	AD000671.3		APOBEC2	ADAM28
	AD001527.2		APOBEC4	ADAMTSL4-AS1
	ADAM11		APOD	ADAP1
	ADAM1A		APOL2	ADCYAP1
	ADAP1		APOO	ADGRV1
	ADCYAP1		APP	ADH5P3
	ADH5P4		AQP4-AS1	ADH5P4
	ADIRF		ARAP1-AS2	ADIRF
	ADIRF-AS1		ARF1	ADIRF-AS1
	ADORA2A		ARF5	AF067845.1
	AF001548.1		ARHGAP19-SLIT1	AF106564.1
	AF106564.1		ARHGAP31	AF107885.2
	AF111169.1		ARHGAP31-AS1	AF127577.1
	AF127577.1		ARHGAP42	AF127577.2
	AF129408.1		ARHGAP44	AF129408.1
	AF201337.1		ARHGEF25	AF131215.2
	AF230666.1		ARID1B	AF131215.4
	AF241726.2		ARID2	AF131216.1
	AF279873.1		ARL2	AF178030.1
	AGAP10P		ARL4AP4	AF201337.1
	AGAP11		ARL4D	AF241726.2
	AGAP12P		ARPC1A	AF279873.1
	AGAP14P		ARPC5L	AGAP2-AS1
	AGAP2-AS1		ARPP21-AS1	AGGF1P3
	AGAP4		ART3	AGO2
	AGAP5		ARX	AHCYP8
	AGAP7P		ASB18	AIFM3
	AHCYP8		ASB9P1	AJ271736.1
	AIFM3		ASCC3	AK3P3
	AJ271736.1		ASGR1	AK5
	AK4P1		ASH1L-IT1	AKAP13
	AK4P3		ASIC2	AKIRIN1P2
	AK5		ASIC4	AKNA
	AKAP2		ASMTL	AL008707.1
	AL008726.1		ASMTL-AS1	AL008726.1
	AL008729.2		ASNA1	AL008729.2
	AL009174.1		ASPHD1	AL009174.1
	AL009181.1		ASPHD2	AL009181.1
	AL020993.1		ASPRV1	AL020994.2
	AL020994.2		ASRGL1	AL020996.1
	AL020996.1		ASS1	AL020996.2
	AL020996.2		ASTN2-AS1	AL020996.3
	AL020996.3		ASXL3	AL021395.1
	AL021068.2		ATAD2B	AL021546.1
	AL021368.3		ATF7	AL021707.3
	AL021395.1		ATF7IP	AL021707.5
	AL021546.1		ATG101	AL021997.3
	AL021707.1		ATG12P2	AL022323.4
	AL021707.3		ATOH7	AL023584.1
	AL021707.5		ATOH8	AL023775.1
	AL021997.3		ATP13A2	AL023806.3
	AL022311.1		ATP1A1	AL024498.2
	AL022341.2		ATP1A3	AL024508.1
	AL022718.1		ATP1B1	AL031284.1
	AL023584.1		ATP2B1-AS1	AL031428.1
	AL024498.2		ATP2B3	AL031587.2
	AL031282.2		ATP5F1A	AL031600.3
	AL031284.1		ATP5F1B	AL031666.2
	AL031320.2		ATP5F1D	AL031676.1
	AL031428.1		ATP5F1E	AL031708.1
	AL031587.2		ATP5IF1	AL031727.1
	AL031600.3		ATP5MC1	AL031729.1
	AL031658.1		ATP5MC3	AL031768.1
	AL031708.1		ATP5MD	AL031846.2
	AL031709.1		ATP5ME	AL031963.1
	AL031710.1		ATP5MF	AL033380.1
	AL031714.1		ATP5MPL	AL033397.2
	AL031727.1		ATP5PBP1	AL033519.2
	AL031729.1		ATP5PD	AL034349.1
	AL031775.1		ATP5PDP4	AL034370.1
	AL031846.2		ATP5PF	AL034380.1
	AL031963.1		ATP5PO	AL035252.4
	AL033519.2		ATP6AP1	AL035411.1
	AL033528.2		ATP6V0B	AL035446.1
	AL034370.1		ATP6V0CP1	AL035458.2
	AL034380.1		ATP6V0E1P1	AL035530.2
	AL034399.2		ATP6V1D	AL035588.1
	AL034550.1		ATP6V1E1	AL049539.1
	AL035252.4		ATP6V1F	AL049569.1
	AL035411.1		ATP6V1G2	AL049629.1
	AL035427.1		ATP6V1H	AL049634.2
	AL035448.1		ATP8A2P2	AL049646.2
	AL035456.1		ATP8B4	AL049650.1
	AL035458.2		ATXN7L3	AL049697.1
	AL049544.1		AUH	AL049775.3
	AL049569.1		AURKAIP1	AL049779.1
	AL049629.1		AVPI1	AL049795.2
	AL049634.2		AZIN1-AS1	AL049829.2
	AL049646.2		B3GALNT1P1	AL049839.2
	AL049650.1		B3GALNT2	AL049844.3
	AL049697.1		B3GALT5	AL049873.1
	AL049775.1		B3GALT5-AS1	AL049873.2
	AL049775.3		B3GAT3	AL050331.1
	AL049779.1		B3GNT10	AL050331.2
	AL049779.2		B4GALNT4	AL050404.1
	AL049780.1		B4GALT2	AL078581.3
	AL049795.1		B4GAT1	AL078612.1
	AL049795.2		BAALC-AS1	AL078621.1
	AL049829.2		BABAM1	AL079301.1
	AL049839.2		BACH1	AL080243.2
	AL049844.3		BACH1-IT1	AL080316.1
	AL049873.1		BAD	AL096817.1
	AL049873.2		BAIAP3	AL096870.2
	AL050331.1		BAP1	AL109615.2
	AL050331.2		BASP1	AL109741.1
	AL050343.1		BAZ2B	AL109804.1
	AL050404.1		BCAM	AL109827.1
	AL078581.3		BCAP29	AL109923.1
	AL078612.1		BCAP31	AL110118.2
	AL078621.1		BCAS1	AL110504.1
	AL079342.2		BCAS2	AL117190.1
	AL080243.2		BCL2L11	AL117190.2
	AL080251.1		BCL7B	AL117209.1
	AL080276.2		BCRP3	AL117329.1
	AL080317.3		BEND3	AL117348.2
	AL096701.3		BEND5	AL118558.1
	AL096711.2		BEND6	AL121594.1
	AL096870.2		BEST3	AL121652.1
	AL109804.1		BEX1	AL121672.2
	AL109811.1		BEX2	AL121694.1
	AL109811.4		BEX3	AL121723.1
	AL109827.1		BEX4	AL121748.2
	AL110118.2		BFSP1	AL121753.1
	AL110504.1		BIN1	AL121758.1
	AL117190.1		BIRC6	AL121821.1
	AL117190.2		BLOC1S1	AL121845.2
	AL117209.1		BLVRB	AL121845.3
	AL117348.2		BMP2	AL121871.1
	AL117350.1		BMP2K	AL121928.1
	AL118556.1		BMP2KL	AL121987.2
	AL118558.1		BMP8A	AL132765.1
	AL121583.1		BMS1P2	AL132780.5
	AL121594.1		BNIP3P10	AL132855.1
	AL121694.1		BNIP3P11	AL132989.2
	AL121723.1		BNIP3P24	AL133227.1
	AL121748.2		BNIP3P25	AL133243.3
	AL121753.1		BNIP3P26	AL133260.1
	AL121758.1		BNIP3P27	AL133304.2
	AL121769.1		BNIP3P40	AL133330.1
	AL121845.1		BOK	AL133342.1
	AL121845.2		BOLA2P2	AL133352.1
	AL121845.3		BOLA3	AL133375.1
	AL121871.1		BORCS6	AL133410.2
	AL121877.1		BPTF	AL133415.1
	AL121895.1		BRD7P4	AL133417.1
	AL121928.1		BRD9P2	AL133453.1
	AL121929.2		BRICD5	AL133477.1
	AL121987.2		BRSK1	AL136038.2
	AL132656.1		BRWD1-IT1	AL136115.2
	AL132780.3		BSG	AL136164.2
	AL132855.1		BSNDP2	AL136295.1
	AL133215.1		BSPRY	AL136295.3
	AL133227.1		BST2	AL136295.4
	AL133260.1		BTBD18	AL136295.5
	AL133268.1		BTBD6	AL136379.1
	AL133351.1		BTD	AL136454.1
	AL133352.1		BTF3P12	AL136531.2
	AL133375.1		BUD31	AL136982.2
	AL133410.2		BX284668.4	AL136982.7
	AL133415.1		BX322234.1	AL136988.1
	AL133417.1		BX322635.1	AL136988.2
	AL133453.1		BX664727.3	AL137077.1
	AL133477.1		C11orf65	AL137127.1
	AL133481.1		C11orf94	AL137145.2
	AL135999.1		C12orf10	AL137230.2
	AL136038.2		C12orf45	AL137779.3
	AL136131.3		C12orf57	AL137784.3
	AL136164.2		C14orf37	AL137786.1
	AL136295.1		C16orf45	AL137847.1
	AL136295.2		C16orf46	AL138713.1
	AL136295.3		C16orf89	AL138752.2
	AL136295.4		C19orf53	AL138960.2
	AL136295.5		C19orf66	AL138963.1
	AL136298.3		C19orf70	AL138963.3
	AL136454.1		C19orf73	AL139011.2
	AL136531.2		C19orf81	AL139021.1
	AL136982.2		C1orf122	AL139095.2
	AL136982.4		C1orf216	AL139095.4
	AL136982.7		C1orf53	AL139100.1
	AL136988.1		C1orf54	AL139125.1
	AL137028.1		C1orf61	AL139184.1
	AL137058.2		C1orf94	AL139240.1
	AL137127.1		C1QL2	AL139260.2
	AL137129.1		C21orf140	AL139274.2
	AL137186.2		C21orf62	AL139289.1
	AL137230.2		C21orf62-AS1	AL139300.1
	AL137247.1		C2CD4C	AL139317.3
	AL137782.1		C2orf40	AL139317.4
	AL137786.1		C2orf68	AL139352.1
	AL138478.1		C2orf80	AL139353.2
	AL138752.1		C2orf88	AL139407.1
	AL138752.2		C4orf48	AL139415.2
	AL138921.1		C5orf42	AL139811.1
	AL138960.2		C5orf49	AL157713.1
	AL138963.3		C5orf56	AL157777.1
	AL139011.2		C5orf64	AL157823.2
	AL139021.1		C6orf136	AL157871.1
	AL139022.1		C9orf131	AL157871.4
	AL139095.2		C9orf16	AL157871.5
	AL139095.4		C9orf24	AL157871.6
	AL139099.1		C9orf78	AL157935.2
	AL139100.1		C9orf84	AL158050.1
	AL139260.2		CA4	AL158066.1
	AL139289.1		CACNA1C-AS4	AL158071.3
	AL139300.1		CACNA1C-IT3	AL158151.1
	AL139317.3		CACNA2D3	AL158151.2
	AL139339.2		CACNB3	AL158152.1
	AL139352.1		CACNG8	AL158201.1
	AL139353.1		CACYBPP1	AL158801.5
	AL139415.2		CADM2-AS1	AL158835.4
	AL157713.1		CADM3	AL158847.1
	AL157777.1		CALB2	AL159163.1
	AL157871.1		CALCRL	AL159166.1
	AL157871.3		CALM1	AL160153.1
	AL157871.4		CALM2	AL160236.1
	AL157871.6		CALM3	AL160236.2
	AL157935.2		CAMK2B	AL160270.1
	AL158050.1		CAMKK2	AL160313.2
	AL158066.1		CAMTA2	AL161452.1
	AL158151.1		CAPNS1	AL161668.3
	AL158151.2		CASC19	AL161672.1
	AL158151.3		CASC6	AL161729.1
	AL158801.5		CASK	AL161757.5
	AL158834.2		CAVIN3	AL161772.1
	AL158835.4		CBFA2T3	AL161787.1
	AL158847.1		CBLB	AL161891.1
	AL159163.1		CBLN3	AL161911.1
	AL160004.1		CBR1	AL162151.2
	AL160153.1		CBR3	AL162231.1
	AL160236.1		CBX3P3	AL162231.4
	AL160236.2		CBX3P4	AL162258.1
	AL160270.1		CBX5P1	AL162258.2
	AL160313.2		CBX7	AL162390.1
	AL160408.2		CC2D2A	AL162426.1
	AL161452.1		CCDC106	AL162431.4
	AL161668.3		CCDC107	AL162578.1
	AL161747.2		CCDC124	AL162741.1
	AL161757.5		CCDC134	AL163192.1
	AL161772.1		CCDC144A	AL163636.2
	AL161787.1		CCDC144B	AL352979.2
	AL161909.1		CCDC151	AL353583.1
	AL162151.2		CCDC184	AL353588.1
	AL162231.1		CCDC196	AL353658.1
	AL162231.2		CCDC26	AL353662.2
	AL162231.3		CCDC28A	AL353689.2
	AL162231.4		CCDC3	AL353691.1
	AL162258.1		CCDC34	AL353699.1
	AL162258.2		CCDC39	AL353748.2
	AL162311.1		CCDC51	AL353784.1
	AL162311.2		CCDC80	AL353795.3
	AL162426.1		CCDC85B	AL353801.3
	AL162591.2		CCDC96	AL353807.3
	AL162742.2		CCER2	AL353807.4
	AL163636.2		CCL3	AL354714.2
	AL352979.2		CCL4	AL354836.1
	AL353588.1		CCM2	AL354892.1
	AL353689.2		CCM2L	AL354892.3
	AL353746.1		CCNJ	AL354943.1
	AL353807.3		CCNO	AL354956.1
	AL353813.1		CCNQ	AL354976.1
	AL353898.2		CCR10	AL354977.2
	AL354714.2		CCT8	AL354989.1
	AL354733.3		CD24	AL355032.1
	AL354740.1		CD34	AL355075.3
	AL354771.1		CD38	AL355075.4
	AL354813.1		CD40	AL355140.1
	AL354836.1		CD44	AL355304.1
	AL354956.1		CD84	AL355310.2
	AL355032.1		CDC37	AL355310.3
	AL355075.1		CDC42EP3P1	AL355312.2
	AL355075.3		CDC42P1	AL355312.3
	AL355075.4		CDC42P5	AL355315.1
	AL355140.1		CDH12P3	AL355385.1
	AL355310.2		CDH22	AL355388.2
	AL355310.3		CDHR2	AL355472.2
	AL355312.2		CDHR5	AL355472.3
	AL355312.3		CDIPT	AL355802.2
	AL355315.1		CDK12	AL355816.2
	AL355385.1		CDK2AP2	AL355916.3
	AL355472.2		CDK5	AL355922.2
	AL355472.3		CDK5R2	AL355987.2
	AL355472.4		CDK6	AL355987.3
	AL355490.2		CDKL1	AL355990.1
	AL355578.1		CDKN2B	AL355994.3
	AL355802.2		CDKN2D	AL356056.3
	AL355816.2		CDR2	AL356057.1
	AL355916.3		CDS1	AL356095.2
	AL355922.2		CEACAM1	AL356124.1
	AL355987.2		CEBPA-AS1	AL356235.1
	AL355987.3		CECR2	AL356475.1
	AL355987.4		CELF2-AS1	AL356479.1
	AL355990.1		CELF2-AS2	AL356481.3
	AL355994.3		CELF5	AL356653.1
	AL356017.1		CEND1	AL356740.2
	AL356056.3		CENPI	AL356776.1
	AL356095.2		CEP128	AL357078.3
	AL356124.2		CEP350	AL357079.1
	AL356475.1		CEP57L1	AL357140.1
	AL356479.1		CEP85L	AL357153.3
	AL356481.3		CERS1	AL357153.4
	AL356653.1		CFAP36	AL357552.1
	AL356968.2		CFDP1	AL357568.1
	AL357140.1		CFL1	AL357568.2
	AL357153.3		CFLAR-AS1	AL358075.1
	AL358075.4		CHAC1	AL358075.4
	AL358333.3		CHAD	AL358333.3
	AL358334.3		CHCHD10	AL358781.1
	AL358781.1		CHCHD2P2	AL358781.2
	AL358781.2		CHCHD2P9	AL358933.1
	AL358937.1		CHCHD4P5	AL358942.1
	AL358942.1		CHCHD6	AL359092.1
	AL359091.3		CHD7	AL359397.2
	AL359397.2		CHGA	AL359643.3
	AL359736.1		CHGB	AL359715.1
	AL359918.1		CHMP2A	AL359715.4
	AL359918.2		CHMP4B	AL359885.1
	AL359921.1		CHMP5	AL359915.2
	AL360181.3		CHRD	AL360091.1
	AL365205.1		CHRM1	AL360169.2
	AL365205.2		CHST8	AL365181.3
	AL365217.1		CHST9	AL365205.1
	AL365232.1		CHTF8	AL365232.1
	AL365273.1		CIB1	AL365277.1
	AL365273.2		CIB2	AL365440.1
	AL365275.1		CICP14	AL390039.1
	AL365277.1		CIRBP-AS1	AL390208.1
	AL365440.1		CISD1	AL390719.1
	AL390039.1		CITED1	AL390726.4
	AL390195.1		CITED4	AL390726.5
	AL390208.1		CKB	AL390774.2
	AL390719.1		CLCN3P1	AL390879.1
	AL390726.2		CLCP1	AL391001.1
	AL390726.3		CLDN10	AL391069.1
	AL390726.4		CLDN20	AL391497.1
	AL390726.5		CLDN5	AL391650.1
	AL391058.1		CLDN9	AL391822.1
	AL391069.1		CLDND2	AL391840.1
	AL391650.1		CLEC11A	AL391863.2
	AL441883.1		CLEC3B	AL391987.2
	AL445183.1		CLHC1	AL391987.4
	AL445183.3		CLPB	AL441883.1
	AL445288.1		CLPTM1	AL442067.1
	AL445305.1		CLSTN3	AL445183.1
	AL445363.3		CLTA	AL445183.3
	AL445433.1		CLTB	AL445250.1
	AL450023.1		CLU	AL445309.1
	AL450063.1		CMAHP	AL445433.1
	AL450306.1		CMAS	AL445472.1
	AL450405.1		CMKLR1	AL445489.1
	AL450998.3		CMTM8	AL445649.1
	AL451070.1		CNGA3	AL445931.1
	AL451085.2		CNIH2	AL449283.1
	AL451142.1		CNN1	AL450023.1
	AL451164.1		CNTFR-AS1	AL450063.1
	AL451164.3		CNTLN	AL450226.1
	AL512310.6		CNTNAP5	AL450405.1
	AL512328.1		COA3	AL450998.3
	AL512356.1		COA6	AL451064.1
	AL512590.3		COL23A1	AL451064.2
	AL512622.1		COL26A1	AL451070.1
	AL512633.1		COL5A3	AL451074.2
	AL512656.1		COL9A3	AL451085.2
	AL512770.1		COMMD8	AL451164.3
	AL512785.2		COMTD1	AL512306.2
	AL512791.1		COPE	AL512310.6
	AL512844.1		COPRS	AL512326.1
	AL513165.2		COPS9	AL512328.1
	AL513175.1		COQ3	AL512356.1
	AL513175.2		CORO1A	AL512604.1
	AL513190.1		CORO2A	AL512622.1
	AL513218.1		COX10-AS1	AL512625.1
	AL513523.3		COX14	AL512633.1
	AL513523.4		COX17	AL512656.1
	AL513548.1		COX4I1	AL512791.1
	AL583722.2		COX5A	AL512844.1
	AL583859.2		COX5B	AL513165.2
	AL589666.1		COX6A1	AL513175.1
	AL589674.1		COX6B1	AL513218.1
	AL589765.7		COX6C	AL513327.1
	AL589843.2		COX6CP1	AL513523.3
	AL589935.1		COX6CP14	AL513523.4
	AL590006.1		COX7A1	AL513550.1
	AL590094.1		COX7A2	AL583722.2
	AL590133.2		COX7A2L	AL583834.1
	AL590139.1		COX7B	AL583859.2
	AL590369.1		COX7C	AL589743.5
	AL590399.4		COX8A	AL589765.7
	AL590714.1		CPB2	AL590094.1
	AL590822.2		CPB2-AS1	AL590133.2
	AL590867.2		CPNE4	AL590139.1
	AL591135.1		CPNE6	AL590369.1
	AL591684.1		CPNE8	AL590399.3
	AL591684.2		CPOX	AL590627.1
	AL591721.1		CPXM1	AL590714.1
	AL591806.3		CR381653.1	AL590762.4
	AL591845.1		CR936218.2	AL590867.2
	AL591846.1		CRABP1	AL591135.1
	AL592078.1		CRABP2	AL591623.1
	AL592114.1		CREB3	AL591684.1
	AL592146.1		CRHBP	AL591719.1
	AL592166.1		CRIP2	AL591806.3
	AL592293.2		CRYZP1	AL591926.3
	AL592430.1		CSMD3	AL592078.1
	AL592490.1		CSNK1G2	AL592146.1
	AL596087.1		CSPG4P12	AL592166.1
	AL603756.1		CSRP1	AL592293.2
	AL603766.1		CST3	AL592430.1
	AL603832.1		CSTB	AL592435.1
	AL603832.3		CTF1	AL592490.1
	AL603839.1		CTXN1	AL596087.1
	AL603962.1		CU633967.1	AL596220.1
	AL606534.1		CU634019.6	AL603756.1
	AL606534.3		CU638689.5	AL603832.3
	AL606760.1		CU639417.1	AL603839.1
	AL606760.2		CU639417.4	AL603962.1
	AL627309.6		CUBN	AL606517.2
	AL627402.1		CUEDC2	AL606760.2
	AL645465.1		CUTA	AL606763.1
	AL645608.6		CUTALP	AL607028.1
	AL645922.1		CXCL14	AL627389.1
	AL645941.2		CXXC5-AS1	AL627402.1
	AL645941.3		CYB561	AL645465.1
	AL662797.1		CYBB	AL645504.1
	AL662799.1		CYC1	AL645608.6
	AL662864.1		CYCSP38	AL645922.1
	AL662884.1		CYCSP52	AL645924.2
	AL662899.1		CYGB	AL645941.2
	AL662899.2		CYP20A1	AL645941.3
	AL669831.1		CYP2A6	AL662797.1
	AL669918.1		CYP2F2P	AL662799.1
	AL670729.2		CYP2T1P	AL662864.1
	AL671710.1		CYP3A5	AL662884.1
	AL671883.2		CYP46A1	AL662899.1
	AL672142.1		CYP7B1	AL662899.2
	AL672207.1		CYS1	AL662907.1
	AL691442.1		CYSTM1	AL669831.2
	AL713999.1		DACT3	AL669831.5
	AL731577.2		DALRD3	AL669841.1
	AL732372.3		DANT2	AL669918.1
	AL807752.2		DAPK1-IT1	AL670729.2
	AL807752.3		DAPK3	AL671883.2
	AL807752.6		DBH-AS1	AL672142.1
	AL807761.2		DBIP1	AL691442.1
	AL807761.3		DBNDD1	AL713999.1
	AL845552.2		DCTN1	AL731566.1
	AL928654.3		DCUN1D5	AL732372.2
	AL928711.1		DCX	AL807752.2
	AL929472.2		DCXR	AL807752.6
	AL929472.3		DDRGK1	AL807761.2
	ALDH1L1-AS1		DDX10P1	AL807761.3
	ALDH7A1P1		DDX18P1	AL845331.3
	ALG1L15P		DDX3P1	AL845472.2
	ALKBH6		DDX60	AL845552.2
	ALS2CL		DEAF1	AL928654.3
	ALX3		DEDD2	AL929472.2
	AMIGO3		DEFB109A	AL929472.3
	AMN		DEFB109D	ALDH1L1-AS1
	AMN1		DGCR11	ALG11
	AMY1B		DGCR12	ALG1L9P
	AMY2A		DGCR5	ALKBH3-AS1
	AMY2B		DGCR6L	ALMS1
	AMYP1		DGKZ	ALMS1P1
	ANGPTL6		DHCR24	ALOX12-AS1
	ANKHD1		DHRS7	ALOX12P2
	ANKHD1-EIF4EBP3		DIRAS1	ALS2CL
	ANKRD19P		DIRAS2	AMN
	ANKRD2		DIRC3-AS1	AMY1B
	ANKRD23		DISC1	AMY2A
	ANKRD24		DISP1	ANGPTL3
	ANKRD29		DLEU2	ANGPTL6
	ANKRD34A		DLG4	ANKRD18EP
	ANKRD34C		DLGAP1-AS1	ANKRD19P
	ANKRD36B		DLGAP1-AS3	ANKRD2
	ANKRD37		DLL3	ANKRD24
	ANKUB1		DLX1	ANKRD34A
	ANO3		DMKN	ANKRD36B
	ANP32AP1		DNAH7	ANKRD37
	ANP32BP1		DNAJB2	ANKRD44-IT1
	ANXA2P2		DNAJC12	ANKRD61
	AP000275.2		DNAJC19P5	ANP32BP1
	AP000282.1		DNHD1	ANXA2P2
	AP000295.1		DNM1P41	AP000282.1
	AP000311.1		DNM1P51	AP000311.1
	AP000317.2		DNM3-IT1	AP000317.2
	AP000346.1		DNM3OS	AP000346.1
	AP000346.2		DNPH1	AP000350.2
	AP000347.1		DOC2B	AP000350.4
	AP000350.4		DOCK11	AP000424.1
	AP000426.1		DOCK8	AP000426.1
	AP000438.1		DOCK9-AS2	AP000438.1
	AP000523.1		DOHH	AP000462.2
	AP000525.1		DPCD	AP000577.1
	AP000688.1		DPP10-AS2	AP000688.1
	AP000721.1		DPP10-AS3	AP000704.1
	AP000757.1		DPP7	AP000711.1
	AP000763.2		DPPA2P4	AP000721.1
	AP000763.3		DPY30	AP000753.3
	AP000763.4		DRAIC	AP000757.1
	AP000777.2		DRAP1	AP000763.2
	AP000777.3		DSCAM	AP000763.3
	AP000781.1		DSCAM-AS1	AP000763.4
	AP000781.2		DSCAM-IT1	AP000777.2
	AP000843.1		DST	AP000777.3
	AP000866.5		DSTN	AP000781.1
	AP000873.1		DTNBP1	AP000781.2
	AP000879.1		DUOX1	AP000787.3
	AP000892.3		DUSP2	AP000793.1
	AP000915.1		DUSP23	AP000843.1
	AP000919.1		DUSP26	AP000857.2
	AP000919.2		DUSP8	AP000866.1
	AP000919.4		DUT	AP000866.5
	AP000936.3		DUTP2	AP000866.6
	AP000942.2		DUXAP9	AP000873.1
	AP001000.1		DVL1	AP000873.2
	AP001001.1		DYNC1I1	AP000889.1
	AP001010.1		DYNLL1	AP000902.1
	AP001029.2		DYNLRB1	AP000942.2
	AP001062.1		E2F3-IT1	AP000962.2
	AP001062.3		EBLN2	AP001000.1
	AP001094.1		EBNA1BP2	AP001001.1
	AP001107.1		EBP	AP001007.1
	AP001107.2		ECE2	AP001007.3
	AP001107.4		ECH1	AP001062.3
	AP001107.6		ECHS1	AP001094.1
	AP001107.7		ECM2	AP001107.1
	AP001107.8		EDDM3CP	AP001107.2
	AP001160.1		EDF1	AP001107.4
	AP001267.1		EDNRB	AP001107.6
	AP001318.1		EEF1A1P12	AP001107.7
	AP001324.1		EEF1A1P3	AP001107.8
	AP001350.1		EEF1A1P9	AP001120.2
	AP001372.3		EEF1A2	AP001136.1
	AP001453.1		EEF1B2P7	AP001160.1
	AP001453.3		EEPD1	AP001266.2
	AP001458.1		EFHD2	AP001267.1
	AP001458.2		EFNA3	AP001267.4
	AP001468.1		EGFL7	AP001324.1
	AP001469.1		EGFR	AP001442.1
	AP001496.2		EGFR-AS1	AP001453.1
	AP001496.3		EGR2	AP001453.3
	AP001610.1		EID2	AP001458.1
	AP001625.3		EIF1AY	AP001458.2
	AP001781.2		EIF1B	AP001468.1
	AP001793.1		EIF3K	AP001496.2
	AP001931.1		EIF4A1P13	AP001496.3
	AP001972.1		EIF4A1P8	AP001541.1
	AP001972.2		EIF4BP2	AP001610.1
	AP001972.3		EIF4EBP3	AP001625.3
	AP002336.3		EIF5AP3	AP001781.2
	AP002373.1		ELF3-AS1	AP001793.1
	AP002380.1		ELOB	AP001931.1
	AP002383.2		ELOCP23	AP001972.1
	AP002414.4		ELOF1	AP001972.2
	AP002433.1		ELOVL4	AP002336.3
	AP002449.1		EMC9	AP002373.1
	AP002472.1		EML2	AP002380.1
	AP002490.1		EMX2	AP002414.4
	AP002748.4		ENDOG	AP002433.1
	AP002770.1		ENHO	AP002449.1
	AP002784.2		ENO1	AP002478.1
	AP002807.1		ENO2	AP002518.2
	AP002812.2		ENO3	AP002748.4
	AP002812.5		ENPP7P12	AP002770.1
	AP002884.3		ENPP7P5	AP002784.1
	AP002893.1		ENTPD7	AP002784.2
	AP002907.1		EPB41L1	AP002807.1
	AP002954.1		EPHA6	AP002833.3
	AP002990.1		ERCC4	AP002884.3
	AP003031.1		ERCC6L2	AP002893.1
	AP003064.1		ERCC8	AP002954.1
	AP003068.1		ERI3-IT1	AP002967.1
	AP003068.3		ERV3-1	AP002990.1
	AP003086.2		ERVH48-1	AP003031.1
	AP003096.1		ESR1	AP003064.1
	AP003097.1		ETF1P1	AP003068.1
	AP003108.2		ETF1P2	AP003068.3
	AP003108.3		ETFB	AP003071.2
	AP003108.5		ETHE1	AP003306.2
	AP003306.2		ETS2	AP003352.1
	AP003352.1		ETV1	AP003354.1
	AP003355.2		EVA1B	AP003392.3
	AP003392.3		EXTL1	AP003396.1
	AP003396.1		EYA1	AP003396.5
	AP003396.5		EZH2	AP003419.1
	AP003419.1		F12	AP003501.2
	AP003465.1		F2R	AP003550.1
	AP003501.2		F2RL1	AP003692.1
	AP003550.1		F5	AP003972.1
	AP003559.1		FAAH	AP004147.1
	AP003692.1		FAAP20	AP004372.1
	AP005018.2		FABP3	AP005018.2
	AP005019.1		FABP6	AP005019.1
	AP005242.4		FABP7P2	AP005131.3
	AP005263.1		FAHD2B	AP005208.1
	AP005329.1		FAIM2	AP005242.4
	AP005403.1		FAM120C	AP005263.1
	AP006216.1		FAM131C	AP005329.1
	AP006222.1		FAM155A-IT1	AP005403.1
	AP006333.1		FAM162B	AP005899.1
	AP006621.1		FAM173A	AP006216.1
	AP1G2		FAM174A	AP006333.1
	AP4B1-AS1		FAM181A	AP006545.1
	API5P1		FAM182A	AP006621.1
	APOC2		FAM184B	API5P1
	APOC4-APOC2		FAM185BP	APOA1-AS
	ARAP1-AS1		FAM189A1	APOC4-APOC2
	ARG2		FAM198A	AR
	ARHGAP27P1-BPTFP1-KPNA2P3		FAM19A1	ARAP1-AS1
	ARHGDIG		FAM20A	ARF1P2
	ARHGEF18		FAM213B	ARG2
	ARHGEF33		FAM215B	ARGFXP2
	ARHGEF39		FAM241B	ARHGAP22-IT1
	ARL17A		FAM43B	ARHGAP26-IT1
	ARL17B		FAM50A	ARHGDIG
	ARL2BP		FAM50B	ARHGEF39
	ARL2-SNX15		FAM66C	ARL17A
	ARL6IP4		FAM66D	ARL17B
	ARMC10P1		FAM81A	ARL2-SNX15
	ARMCX3-AS1		FAM84B	ARL6IP4
	ARMCX7P		FAM86HP	ARMC10P1
	ARPC3P5		FAM89B	ARMCX3-AS1
	ARPC4-TTLL3		FAM96B	ARPC4-TTLL3
	ARSD-AS1		FANCC	ARRDC3-AS1
	AS3MT		FARSA	ASAP1-IT2
	ASB2		FAT1	ASB2
	ASPDH		FAT3	ASPDH
	ATF4P3		FAU	ASXL2
	ATF4P4		FBLL1	ATAD5
	ATF7IP2		FBN2	ATF4P4
	ATG10		FBXL15	ATG10
	ATG9B		FBXL19	ATG9B
	ATP1A1-AS1		FBXO17	ATM
	ATP5F1AP2		FBXO2	ATP13A4
	ATP5F1CP1		FBXO27	ATP13A4-AS1
	ATP5F1EP2		FBXO41	ATP1B1P1
	ATP5MDP1		FBXO44	ATP5F1AP2
	ATP5MF-PTCD1		FBXW5	ATP5F1CP1
	ATP6V0C		FCF1P7	ATP5F1EP2
	ATP6V0E2-AS1		FCGBP	ATP5MC2P3
	ATP6V1C2		FCHO1	ATP5MF-PTCD1
	ATP6V1E1P1		FERMT1	ATP6V0C
	ATP6V1G2-DDX39B		FES	ATP6V0E2-AS1
	ATRIP		FGF12-AS2	ATP6V1C2
	AUNIP		FGF14-IT1	ATP6V1E1P1
	B3GAT3P1		FGF7P8	ATP6V1G2-DDX39B
	B3GNT4		FGFR3	ATP7A
	BANF1P3		FHDC1	AUNIP
	BBS1		FIBP	B3GAT3P1
	BCAS2P2		FIGN	B3GNT4
	BCAS4		FIRRE	B3GNT5
	BCKDHA		FIS1	BANF1P3
	BCL11A		FKBP2	BARD1
	BCL2L2-PABPN1		FKBP3	BCAS4
	BCLAF1P2		FKBP7	BCL2L2-PABPN1
	BCYRN1		FKBP8	BCLAF1P2
	BDH2P1		FKTN	BDH2P1
	BEGAIN		FLOT1	BECN1P2
	BEST1		FLOT2	BEGAIN
	BEX5		FLVCR2	BEST1
	BHLHE22		FMC1	BEX5
	BICDL1		FMNL1	BHLHE22
	BIVM-ERCC5		FNDC10	BICDL1
	BLOC1S5-TXNDC5		FNDC3B	BICRA-AS1
	BMPR1APS2		FNDC4	BIRC6-AS2
	BNIP3P1		FNDC5	BIVM-ERCC5
	BOLA2		FNDC9	BLID
	BOLA2B		FO393419.2	BLOC1S5-TXNDC5
	BOLA2P1		FO393419.3	BMS1P1
	BORCS7-ASMT		FOSB	BMS1P14
	BORCS8-MEF2B		FOXG1-AS1	BMS1P4
	BPTFP1		FOXQ1	BNIP3P1
	BRD7P2		FP325331.1	BNIP3P4
	BSCL2		FP700111.1	BNIP3P42
	BTBD8		FRG1BP	BOLA2
	BTF3L4P2		FRG1-DT	BOLA2P1
	BTF3P10		FRG1JP	BORCS7-ASMT
	BUB1B-PAK6		FRMPD3	BORCS8-MEF2B
	BX255923.2		FRS3	BRD7P2
	BX664615.1		FSIP2	BRWD3
	BX679664.3		FTCDNL1	BSCL2
	BX842568.4		FTH1P15	BTAF1
	BZW1P2		FTX	BTBD10P2
	C10orf95		FUCA1P1	BTF3L4P2
	C11orf87		FUNDC1	BTF3P10
	C11orf97		FUT1	BUB1B-PAK6
	C11orf98		FUZ	BX571846.1
	C15orf38-AP3S2		FXYD2	BX664615.1
	C16orf92		FYB1	BX679664.3
	C17orf107		FZD9	BZW1P2
	C17orf49		G0S2	C11orf97
	C18orf32		GABARAPL1	C11orf98
	C1DP1		GABPB1	C11orf98P1
	C1orf115		GABPB1-AS1	C15orf38-AP3S2
	C1orf167		GABRD	C16orf92
	C1QTNF3-AMACR		GADD45GIP1	C17orf78
	C1QTNF4		GALNT13	C18orf15
	C1QTNF5		GALNT17	C18orf32
	C21orf33		GALNT8	C1DP1
	C2orf74		GALNT9	C1orf115
	C3orf80		GAMT	C1orf220
	C4A-AS1		GAP43	C1QBPP2
	C4B-AS1		GAPDH	C1QTNF3-AMACR
	C4orf50		GAPDHP59	C1QTNF4
	C5orf66		GAPDHP61	C20orf204
	C6orf201		GAPDHP65	C2orf16
	C6orf47-AS1		GAPDHP66	C2orf74
	C7orf25		GAS6	C3orf35
	C7orf55-LUC7L2		GAS8-AS1	C3orf80
	C8orf88		GCAT	C6orf163
	C9orf129		GCM2	C6orf201
	CA11		GDAP2	C6orf47-AS1
	CA7		GEMIN7	C7orf55-LUC7L2
	CABP1		GEN1	C8orf88
	CACNA1B		GFRA2	C9orf129
	CACNA1C-AS1		GGCT	C9orf147
	CACNA1I		GHITM	CA11
	CACNG3		GHRLOS	CA7
	CACTIN-AS1		GIMAP7	CABP1
	CACYBPP2		GINS3	CACNG3
	CADM3-AS1		GIT1	CACTIN-AS1
	CALHM1		GJA9	CACYBPP2
	CALM2P2		GLIS3	CADM3-AS1
	CALM2P3		GLRB	CALHM1
	CALML4		GLT1D1	CALM2P2
	CALY		GLTPD2	CALML4
	CAMK1		GLYCTK	CALY
	CAMK1G		GMDS-AS1	CAMK1
	CAMK2A		GMFG	CAMK1G
	CAMK2N1		GMPR	CAMK2A
	CAMKK1		GNAS	CAMK2N1
	CAMKV		GNB4	CAMKK1
	CAP2		GNG11	CAMKV
[truncated: 2,011 more rows]

## Sheet: Module genes
GEO-LGG selected Modules								TCGA-LGG selected Modules
Salmon	Blue	Green	Cyan	Pink	Lightgreen	Red		Blue	Yellow
BCAS1	BAD	REX1BD	C12orf57	MLF2	SEMA3F	ARF5		TNFRSF12A	PRR11
CHMP5	CD38	MPND	ADCYAP1	RBM42	CLEC11A	HSPB6		SCIN	MCM2
FKBP3	NDUFAB1	NME1-NME2	CRH	MMACHC	FSCN3	TAC1		BTK	FNDC8
WFDC2	KDM7A	ZBTB32	DUSP2	SFT2D3	CUTA	SPATA20		MRC2	N4BP2
ECH1	TRAPPC6A	PPEF1	AMY1B	TOMM7	VGF	GGCT		TYROBP	MMP2
GSTM1	BAIAP3	EMC9	GLTPD2	TRGC2	PIMREG	PNPLA4		CD74	TPX2
C9orf78	TSR3	PFDN4	CYCSP45	HSPA8P8	LRRC32	TOMM34		CD44	CPXM1
HNRNPA1L2	REV3L	GABPB1	RNU6-1240P	MTCO2P12	PTMS	VRK2		MSR1	BIRC5
ZNF593	UQCRC1	ISYNA1	RNU6-33P	CBR1-AS1	RAC3	SLC4A7		TNC	TOP3B
IDI2	FUZ	ENO3	SNORD83B	NDP-AS1	CD34	TMSB10		KCNQ1	CENPM
BEND5	ABHD5	SEC16B	MIR762	RPSAP15	COX8A	TNC		TBXAS1	MCM5
RBP7	PLEKHB1	FAM209A	RNU6-244P	RPL23AP65	SMIM11P1	PKM		CHI3L2	MYBL2
ANKRD2	IKZF2	CHST8	EEF1B2P2	MTRNR2L1	RPL13P12	FUNDC1		CD84	ARL2BP
KRT1	MFAP3	PKMYT1	ZBTB45P2	MTCO1P40	HLA-U	ATP6AP1		DHRS9	RNASEH2A
STIP1	PNKP	MRPS12	VDAC1P6	UBBP4	WBP1P1	FAM50A		ICAM3	ASF1B
TM4SF1	THAP3	CALML4	SLC4A1APP1	PROX1	RPS15P4	ENO1		APBB1IP	TSPAN12
LSM1	ADAM28	DUSP26	UBE2E4P	PLXDC2	HNRNPA3P5	MYDGF		FYB1	EZH2
CNTD1	CNTLN	MRPS36	EZR-AS1	RREB1	SYP-AS1	UBE2T		PTGS1	FOXM1
SVBP	CC2D2A	CLDN10	RPL10P9	WDFY4	RPS27P29	MOXD1		TREM2	OGFOD2
PPP1R14BP3	ZNF800	RPL13AP25	C19orf81	ZFHX3	MLF1-DT	ACHE		MFNG	TIMELESS
PCP4	ERCC8	PSMB7	NUCB1-AS1	NOPCHAP1	NME2	PIR		SH3BP1	PTK7
ALDH1A3	BORCS8-MEF2B	GMPR	RPL3P9	TLR1	SNORD87	BLVRB		POLR2F	CEP72
EDARADD	IDH3G	MORN3	RNA5SP392	ZNRF3-AS1	PNMA6B	SMPX		KHNYN	LMNB1
PTMA	GRIPAP1	RHOF	LRRC24	GOLGA8R	IGSF9B	PSMD8		SLA2	NID1
MT1F	RASGRP2	SLC5A2	A2ML1-AS1	SNORA60	HELLS	RASSF7		SIRPB1	PINK1-AS
FTH1P3	ACTL6B	KATNB1	UBE2F-SCLY	SNORA21	H2BC11	LGALS1		CKM	CDC20
PTMAP5	ITM2A	ASGR1	SNRPGP2	SNORA63E	SCN3A	NEFH		EBI3	CENPF
RPL17-C18orf32	MRPL28	MISP3	MTATP6P2	SNORA31	LRATD2	PVALB		SLC1A5	POLR1G
FGF7P8	HBQ1	SRPRB	MIR1244-2	SNORA52	H3C13	ABHD12		SIGLEC8	PMFBP1
RAB6C	PSMC5	RGS20	RNU5E-1	RNU1-18P	H1-5	PSMA7		CPVL	NCAPH
RPS26P15	GNAS	PAOX	SNORD9	RNU5B-1	H2BC13	SNTA1		SFRP4	CCZ1
UBE2SP2	CHGB	FRG1BP	SNORD16	RNU5D-1	KIF18B	CST3		DOCK8	TUBA1B
NPIPA3	YPEL3	LY6K	RNU1-19P	RNU1-83P	H2AC13	GPR143		LGALS3BP	AUNIP
ST13P6	NDUFB2	SFTPC	SNORA63	RN7SKP255	H2AC7	PRPS2		ABI3	TUBBP1
UPF3AP1	NAT14	ZNF524	SNORD46	SNORA71D	H4C11	UBL4A		MS4A6A	TNFRSF19
C6orf47-AS1	NLRP1	TCAP	SNORA65	SNORA38B	H3C4	HCFC1R1		MS4A4A	TOP2A
SUMO2P21	HSP90AB1	CENPS	RNA5S9	SNORD118	LIMD1-AS1	RHOV		SELPLG	HMGB1P5
HLA-DRB6	OCEL1	FAM89B	SNORA57	RN7SKP203	H2BC14	NIPAL2		LY86	PDGFRA
RHEBP1	POLR2E	COX14	SNORD116-14	SNORA33	H2BC8	GSDMD		CD86	ARHGEF39
EIF4EP2	SH3BP1	KCNK4	SNORD116-17	RN7SKP180	H2BC17	NUCB1		RPE65	IGFBPL1
TCEA1P2	GCAT	BRICD5	SNORD116-9	SNORD8	H2AC12	NFKBIB		OLFML3	TCF19
FAM133DP	POLR3H	GPR39	SNORD116-2	SNORA80A	H3C11	GPI		KMO	NRM
SKP1P1	AHSA1	TSPYL2	SNORA54	RNU4-1	H2AC14	PPP2R1A		VAMP8	NUSAP1
BDH2P1	SLA2	VSIG10L	SNORD116-3	SNORA38	H2BC3	COPE		TMEM156	KIF11
SELENOTP1	SLCO4A1	TNFRSF18	SNORD116-1	SNORA3A	H2AC16	TMEM147		TMIGD3	TP53
API5P1	TCFL5	PRR13P5	SNORD116-8	RNY1	H2BC7	HSPB1		SASH3	KIF2C
RPL39P3	ZNF821	H3-5	RNU6-16P	SNORA58B	H4C1	NPTX2		NCKAP1L	ATP6V1C2
MCF2L-AS1	PRSS54	RPS2P46	RNU6-31P	SNORA63D	H2AC17	BUD31		C3	CDCA7
FAUP1	NME3	CFAP119	SNORD116-15	RNA5SP141	H3C10	IMPDH1		WDFY4	ZNF300
DRG1P1	MPG	IER5L-AS1	SNORA14B	SNORA55		AP1S1		CD68	MKI67
MYCBP2-AS1	HAGHL	CBWD4P	SNORD116-16	SNORA71C		RARRES2		APOC1	SPC25
ZNF133-AS1	HMOX2	SYCE1L	SNORD116-24	SNORA14A		BCL7B		PLVAP	CCNB2
UQCRBP1	CDIPT	LCMT1	RNU6-29P	SNORA5C		LIMK1		ANGPTL6	TMSB15A
MID1IP1-AS1	OAZ1	KRTAP5-2	SNORD116-23	SNORA23		PHYH		GFAP	DRAXIN
RPSAP12	SNAPC2	COX20P1	SNORD116-6	RNY3		RAB34		GALNT15	KIF15
SETP14	C19orf53	HNRNPA3P6	SNORD116-19	SNORA62		NDUFC1		NAPSB	CDC25A
LRRD1	TBCB	PPM1N	SNORA7A	RNU4-2		SOD3		XAF1	WEE1
RPL5P1	ETFB	HNRNPA1P10	SNORA26	SNORA2A		HTATIP2		ACY3	PBK
FTH1P23	CDC37	MYL5	SNORD23	SNORA69		GAPDH		ALOX5AP	MGAT2
HIGD1AP14	WDR83OS	YWHAZP10	PABPC1P11	SNORA80B		TPI1		LOXL2	CDK1
SERBP1P5	LENG1	RPL32P16	SCARNA12	RNU1-11P		TPD52L1		DOCK2	KCNMB3
RAP1BL	PRPF31	PRR29	SNORD10	RNVU1-18		RBM24		APLNR	RRM2
ZFP91-CNTF	USF2	RPS26P58	SCARNA10	SNORA6		NR2E1		SLC37A2	SMN1
ST20-MTHFS	ETHE1	LINC01529	SNORA59A	SNORA15B-2		PERP		HAVCR2	CBX2
MYL12-AS1	EDF1	HSPA9P1	RN7SL709P	SNORA10		QPCT		AOAH	UBE2C
URGCP-MRPS24	DNAJC12	EEF1DP2	SNORD116-26	SNORA1		LAMTOR2		CIDEB	SPSB4
SNURF	SEPTIN4	PABPC1L2B-AS1	RNY4	SNORA5A		SDHB		CD72	ZNF135
ZNF511-PRAP1	SLC25A11	RPL23AP74	SNORD116-25	SNORA75		ATP6V0B		IFI44L	SOX11
TAOK1	CHRNE	POLR2MP1	SNORA50B	SNORA24B		MYL12B		CD27	GAS1
TAC4	RPL34	RCC2-AS1	MIR3648-2	SNORD15A		STBD1		IGSF6	PIPSL
RPL21P8	SIAE	PABPC4-AS1	SNORD3B-1	SNORA36A		PPL		IRF8	MAP3K15
EEF1B2P7	ANAPC15	PTGES3P3	SNORA44	SNORA50A		BSPRY		PIK3R5	TMEM45A
RN7SKP154	SLC22A18	MED8-AS1	SNORD116-22	SNORA27		HDHD3		SIGLEC10	ZNF93
ADH5P3	AIP	HAR1B	MIR3648-1	SNORA15B-1		CYSTM1		MMEL1	KIF18B
CCNJP2	ATP5F1B	IPO9-AS1	SNORD22	SNORA72		CLU		HAPLN1	EDARADD
ATP5PBP1	ALDH2	LSM12P1	SNORD116-21	SNORA7B		TNFSF10		EPHA1	NHEJ1
SLC25A39P1	MRPL51	EEF1B2P3	SNORA61	SNORD116-7		HS3ST2		RGS10	PLSCR3
HMGN1P2	LDHB	PET117	SNORD116-20	SNORA70		G0S2		IL18	DHFRP1
B3GALNT1P1	COX6A1	FMNL1-AS1	SNORA16A	SNORA68		BCAS4		EDNRA	PPIAP22
TTLL7-IT1	HDDC2	PMS2P9		SNORD116-5		NQO2		ANKRD22	MFSD2B
EIF4EP1	MRPL2	UQCRHL		RNU1-148P		NRN1		DAB2	RNU6-4P
EDDM3CP	DNPH1	UBE2SP1		SNORA37		MT1G		ABI3BP	RNU1-3
COX6CP13	COX7A2	PTGES3P1		SNORA2B		BFSP1		SAMSN1	MIR25
POU5F1P4	CEP72	TPT1P9		RNU1-89P		DYNLRB1		SLC7A7	MIR621
COX6CP14	SELENOK	ASMTL-AS1		SNORA20		ROMO1		VSIG4	MXD3
RPL7P15	PODXL2	RRAS2P1		SNORA64		MMP24OS		SLA	GPC2
IQCJ-SCHIP1-AS1	REEP6	BANF1P3		SNORA41		CAPNS1		MMP14	ZNF90
RN7SL344P	POLE4	PCDHGC5		SNORA80E		PLA2G5		SUSD3	LDHAP4
RN7SL735P	SPR	RPL7AP30		SNORA46		SDF2L1		ZFHX2-AS1	TUBAP2
SLED1	PARK7	MRPL33		SNORD94		A4GALT		C1QC	HNRNPA3P3
DUTP7	MRPS15	TMEM141		SNORA49		KRT17		HK2	H2AZP3
GPAT4-AS1	KCNQ4	CCDC13		SNORA48		ATP6V1F		TNFRSF13C	HMGN1P4
FTLP6	PINK1-AS	ASPRV1		SNORD67		EIF2S2P4		ITGB2	CYP4F25P
CACNA1C-IT3	B4GALT2	SERBP1P6		SNORA74B		CHAC1		CXCL16	UBE2SP2
ATP6V1E1P2	PRDX1	EEF1A1P9		SNORA12		ADRM1		LAPTM5	PITX1-AS1
IMMP1LP1	TREH	NPM1P27		SNORA3B		MPP1		VCAM1	TMEM183BP
NRBF2P5	C1orf54	YJEFN3		CCDC7		LGALS3		OLFML2B	YBX1P1
PPIAP52	HMGN3	PCDHGA5		SNORA11B		SERPINF1		HPGDS	ODF2-AS1
MIR223HG	NDUFA8	RNF5P1		SNORA11F		MED10		CTSS	MEMO1P1
RN7SL736P	SLIRP	CHMP4A		SNORA11D		RTL8C		TNFAIP8L2	ST7-AS1
RN7SL856P	ACAT2	ZNF286A-TBC1D26		SNORA2C		COX5B		CCR1	SAPCD1
	PEX16	PDCD5P1		SNORA77		TXN		TLR3	YBX1P2
	TMEM54	ST13P3		RNU6ATAC		CCN3		TAGAP	KMT5AP2
	MTIF3	P2RX5-TAX1BP3		SNORA11E		FLOT1		SYK	SLCO4A1-AS1
	GTF3A	BCL2L2-PABPN1		SNORA11		GCOM1		FBP1	UBE2SP1
	WDR83	SYNJ2BP-COX16		SNORA11G		FAM181A		CYBB	HMGN2P5
	ATG101	BLOC1S5-TXNDC5		RNU2-36P		OSBPL1A		FOLR2	H3P6
	ATP5F1E	HNRNPUP1		RNU2-2P		STAC2		EML5	LDHAP2
	NDUFB4P12	NDUFA5P11		RNU2-59P		IFITM3		ADAMTS15	ELOA-AS1
	SNRPC	PMF1-BGLAP		SNORA79B		EVA1B		MS4A7	PRPF31-AS1
	NDUFA1	ELOCP27		SNORA71A		SDHC		CCDC103	KIFC1
	PPP1R12C	CEP192-DT		LYST-AS1		PFDN2		TUBA1C	HMGN2P17
	ALKBH7	CEBPA-DT		RPL4P6		SELENBP1		CD300C	TXNDC5
	SNRPD2	LINC01785		RPL30P16		SMYD2		CX3CR1	GET4
	MRPS26	SCGB1B2P		PDE4DIPP6		JTB		P2RY12	PPP1R35-AS1
	TMEM53	COMMD3-BMI1		SNORA71B		S100A8		PTAFR	COX19
	PRDX5	FMC1-LUC7L2		CCDC200		EFNA3		RNASE6	TTC4
	PRMT1	TLCD4-RWDD3		SNORA13		ARF1		CYTL1	STARD4-AS1
	COX7C	MROH7-TTC4		RNU1-88P		GUK1		TMEM37	RBM14-RBM4
	AUNIP	CYP4F33P		SNORD97		OCIAD2		GPR34	RBBP4P1
	UQCR11	PRAL		RNVU1-2		ABRACL		COL8A2	SERBP1P5
	VIL1	TMEM265		SCARNA18		NDUFB11		C3AR1	C8orf88
	GNG11	NFE2L3		SNORA47		EBP		RAB43	HMGN1P38
	DGCR6L	XYLB		SNORD13		PTGES		HPSE	PAICSP4
	DUT	CCDC134		SNORA84		GSTO1		C1QB	CKLF-CMTM1
	SOX15	SLC10A1		RN7SL128P		ALDOA		C1QA	MSH5-SAPCD1
	NEDD8	SRPX2		RN7SL558P		MEPE		LRRC25	HMGN2P6
	RPS4Y1	SLC25A15		RN7SL396P		NMRAL1		UCP2	ZNF625
	DOHH	ADRA1A		SNORA58		ATP5MC3		CNTD1	NOVA1-DT
	GALNT8	GCNT7		SCARNA22		HK1		CD163	RTEL1
	ELOF1	GNL3L		SCARNA8		NTAN1		C18orf32	PDF
	GDF1	ANGPTL3		SCARNA6		DUSP23		TPPP2	TUBB3
	MRPL34	SPDYE1		SCARNA23		PSMB4		HCLS1	TGIF2-RAB5IF
	JUND	TSSK4		SCARNA11		CSTB		P2RY13	DUT-AS1
	YIPF2	MMP21		SCARNA5		UBE2Q1		CSF1R	ZNF8-ERVK3-1
	ZNF428	REL		SNORA74D		MRPL55		TMEM119	SLC25A1P5
	COX4I1	H1-4		SCARNA13		S100A9		EIF3C	KLC4-AS1
	COX7B	IRX2		SCARNA20		ATP1A1		CSF1	INO80B-WBP1
	F12	RAB40A		SCARNA14		THOC7		LPAR5	UHRF1
	NR1H2	ZNF454		SCARNA21		RPL39L		APOBR	SENP3-EIF4A1
	TRAF7	GEN1		SCARNA3		CCDC51		CYCSP45
	PEX11B	NSUN3		RN7SKP176		HMGB2		ARHGAP30
	FLOT2	C5orf64		SNORD3A		PGAM2		LILRB4
	POMP	NEB		RNU4ATAC		TMUB1		FPR3
	TCEAL4	SLC2A3P2		RNVU1-31		DYNLT3		PRR13P5
	HSPBP1	GP1BA		SNORA51		IFI27		TMSB4XP8
	CSNK1G2	HSPE1P11		SNORA35B		PCBD1		HLA-DRB1
	BLOC1S1	PRSS48		SNORA28		BEX3		SERPINA3
	SLC26A10	ZNF124		SNORA78		ACAA2		GIMAP5
	PRADC1	ZNF300P1		SNORA71E		GPX4		TLR7
	MRPS9	ZNF69		U2		TUBA1C		HLA-DQA1
	ISCU	RN7SKP243		SCARNA16		YIF1B		GAL3ST4
	VILL	RN7SKP78		RN7SKP175		IGFBP6		GPX1P1
	TUBB2B	RNU4-16P		SNORA24		PNOC		MPEG1
	RPL7P9	RN7SKP239		RNU12		RNF187		S100A10
	SLC3A1	BMS1P1		SNORA17B		NDUFS5		FCHSD1
	CYP2C8	TAS2R50		SNORA9		VAMP5		CSF2RA
	ANXA7	RPL7AP60		SNORA50C		HSPB3		HLA-DRB5
	METTL5	RPL11P3		SNORA67		HINT1		HLA-DOA
	COX17	AKR1B1P3		RNVU1-2A		MT1E		HLA-DMA
	ANXA3	HNRNPA1P15		SCARNA4		EMX2		HLA-DRA
	NABP2	LINC00612		SNORD3D		SCG2		AIF1
	SRP14	DBIP1				BSG		SAMD9
	NDUFB10	NPM1P37				COPRS		C21orf62
	SAT2	BECN1P2				POP7		SNORD89
	MIEN1	HNRNPH1P1				COPS9		IFITM9P
	SOD1	C21orf140				TMEM70		STIMATE
	APP	RN7SKP97				AURKAIP1		SOGA3
	MMEL1	RN7SKP273				SSNA1		ZC3H11B
	TINAGL1	RNF14P4				PLAAT3		IFI30
	NME7	BCL10-AS1				NDUFAF3		HLA-DQB1-AS1
	NDUFS6	RPL7P57				RPP25		HLA-DPB1
	MDH2	E2F3-IT1				H3P47		APOC4-APOC2
	AUH	ARL14EPP1				PDIA3P1		GOLGA2P7
	PAXX	VPS26BP1				GREM2		LINC01529
	NKX6-2	CHCHD4P5				PHLDA2		KCNIP2-AS1
	B3GAT3	LHFPL3-AS2				ATG9B		FTLP3
	FAU	NRSN2-AS1				LSM10		HCG4B
	ATP5F1A	TNPO1P1				FES		LINC01736
	ATG10	ATP13A4-AS1				NPB		VIM-AS1
	CFDP1	RTRAFP1				UQCR10		NAMPTP1
	RSPH10B	HSPE1P13				MAP7D2		IFITM3P4
	RRAGA	LINC02097				APOO		CBR1-AS1
	CCT8	RPS3AP27				SH3BGR		HLA-DPA1
	UBXN11	SORCS3-AS1				PCYT2		ANXA2P2
	ATP5MC1	KCNQ2-AS1				BCAP31		RHOQP2
	ALDH4A1	COPS8-DT				ISG15		PIRT
	CCDC107	MTND4P15				TUBB4B		GAS6-AS1
	RSPH1	RPS20P15				PRR19		ANAPC1P4
	CLDND2	PTPRT-AS1				SLC24A5		APOC2
	PAQR6	LINC02344				IER5L		JAKMIP3-AS1
	PTH1R	EIF4BP2				NDUFA4		CDK5R2-AS1
	JMJD8	PCMTD1-DT				S100A13		NFAM1
	FAAP20	FRMD3-AS1				PRTN3		HSPB1P1
	H2AZ1	KANSL1L-AS1				LAGE3		RPL26P30
	NDUFS4	RPL37P18				BNIP3P1		FAM157A
	FOXQ1	RPL21P44				GPX1P1		TMSB4XP1
	UQCRQ	ZRANB2-DT				C1orf122		HLA-DMB
	NOS3	AK3P3				MAFK		TICAM2
	COX6C	HSDL2-AS1				HLA-G		CFB
	NDUFB6	ATP6V0CP1				MT1H		APOBEC3C
	COMTD1	GNA13P1				TMSB4X		PCED1B-AS1
	PSMC3	HNRNPA1P59				HLA-H		TNXA
	SMCO4	ATP5MC2P3				BTF3L4P2		NAIP
	CKB	SF3A3P1				HMGB1P10		LINC02381
	PLD4	PHBP12				ACTBP2		TMED7-TICAM2
	CIAO2B	LINC02580				TUBAP2		LINC01094
	MESP1	HNRNPA1P68				MTCP1		MIR124-1HG
	SAMD14	DSTNP1				CHCHD2P2		TAGLN2P1
	CCDC103	RPS3P2				FAM240C		SIGLEC14
	ENDOG	WARS2-AS1				GSTM2P1		RNASE4
	PRRT2	ARL4AP4				FTH1P8		RAB43P1
	RAB4B	HMGB3P14				PPIAP9		COSMOC
	DAPK3	TRAF3IP2-AS1				DENND10P1		LINC01572
	OTUB1	RPL18AP7				FTH1P10		SEPTIN4-AS1
	CDK2AP2	MTND2P23				IFITM3P2		RN7SL138P
	PRDX2	MIR3936HG				SDHDP6		RUNDC3A-AS1
	BEST1	HDAC1P2				UBE2D3P1		EGLN2
	SAC3D1	LINC00456				RPL23AP2		LINC02712
	CMAHP	ZNF197-AS1				FTLP3		LENG9
	HEXIM2	SETP5				FTH1P16		FCGBP
	COMMD8	TPMTP2				GAPDHP1		PRAL
	ASMTL	ELF3-AS1				VIM-AS1		PCDH20
	SLC25A6	LINC00412				NAMPTP1
	MRPL1	LINC01135				YWHAZP3
	RSPH10B2	RPL7L1P3				TMSB4XP6
	DCXR	DSCAM-AS1				EXOSC10-AS1
	SF3B5	RPS2P15				ANXA2P2
	TRAPPC1	TNR-IT1				ST13P4
	NSG2	PCBP2P1				RAB1C
	MRAP	MACROD2-AS1				RPSAP69
	CMTM8	COX5BP3				WASH4P
	UBB	PPP1R9A-AS1				FABP5P7
	SCAND1	MED28P7				CHCHD2P6
	PPID	ANKRD44-IT1				GAPDHP65
	SYCE1	CYP2F2P				FTH1P11
	RPS21	BRWD1-IT1				SMU1P1
	LRRC20	MTCO2P19				RPL37P2
	CFL1	PARK7P2				MTATP8P1
	SNX32	FRY-AS1				MIF
	CCDC96	MTCO3P11				ARPC1A
	GPR137	LRIG2-DT				ABHD17AP3
	MZT2A	RPL21P10				RNU6-914P
	ZNRD2	ST3GAL6-AS1				C8orf88
	ZNF622	RPL12P20				DNAJB6P1
	CCDC106	PSMD6-AS2				HIGD1AP1
	ATP5MK	ETF1P2				MT1L
	SNAPC5	RN7SL297P				MIR3661
	MICOS13	RN7SL382P				MTRNR2L6
	SEZ6L2	RN7SL23P				MUSTN1
	DRAP1	RN7SL751P				ADIRF-AS1
	ZNF135	RN7SL809P				PDK3
	DPP7	SUCLG2-DT				MID2
	DEAF1	RN7SL767P				LAMA1
	HIC1	GUSBP2				CENPI
	C18orf32	RN7SL390P				TENT5A
	POLR2L	FOXP1-IT1				H1-3
	PPP1R42	RN7SL127P				LYST
	RPS3AP5	ZBTB20-AS5				FAM120C
	GTPBP6	RN7SL413P				H3C15
	ARMC10P1	RPL7P49				RNVU1-7
	GLULP4	RPL31P58				SFT2D2
	COX5A	RPL30P14				RPL18AP2
	MSC	RN7SL464P				MRPL53P1
	HYI	RPL5P14				MRPS6P2
	EIF3K	THAP12P2				ITPK1P1
	CYC1	RN7SL308P				RN7SL329P
	FARSA	LINC01322				NEAT1
	TMEM86B	RN7SL330P				PVT1
	MAP3K15	EEF1A1P4				PLBD1-AS1
	SLX1B	FRG1-DT
	ARL6IP4	NADK2-AS1
	B4GALNT4	LINC01550
	CRIP2	GNAO1-DT
	LYSMD4	RGMB-AS1
	RPSAP19	CCNL2P1
	MRPL54	LUCAT1
	HMCES	BACH1-IT1
	NPIPA5	ARHGAP22-IT1
	COA3	LINC01948
	BRD7P2	FAM151B-DT
	CLDN5	ENPP7P1
	ACOT1	ATP1B1P1
	SRPK3	KRT18P31
	CIB1	RHOQ-AS1
	SIGIRR	GAPDHP43
	IFITM2	HTT-AS
	IFITM1	MTND1P19
	GPAT2	STPG2-AS1
	KRT10	RN7SKP287
	SMIM29	RN7SKP96
	CFAP73	RN7SKP234
	RPS19BP1	MAILR
	BCAM	PCAT1
	HS6ST1P1	HMGB1P41
	RINL	PBOV1
	FAM166A	LINC02235
	FBLL1	NDUFA3P2
	NPIPP1	PTPRJ-AS1
	RPL10AP2	NAV2-IT1
	NELFB	CACNA1C-AS4
	TMEM120A	SNRPGP18
	RPS2P4	FOXN3-AS2
	TCEAL3	PTCSC3
	BORCS6	HMGN1P1
	NPIPB10P	CYCSP38
	ANXA6	MRC1
	CH17-340M24.3	HNRNPA3P11
	DACT3	DPPA2P4
	MBP	CCNYL7
	ODAD3	H2BC20P
	UBL5	LINC00662
	GET3	MFSD1P1
	BZW1P2	SAMD11P1
	PPIAP22	LINC01977
	ABHD17AP1	DLGAP1-AS3
	EIF1AY	LINC02003
	PPP1R14C	FSBP
	CCDC152	ZNF561-AS1
	SHISA4	EIF5AP3
	L1CAM	UBE2V2P2
	RNU6-529P	CIRBP-AS1
	7SK	BNIP3P40
	RNU6-395P	CDC42EP3P1
	C1orf53	LDHAL6EP
	MSTO2P	GOLGA4-AS1
	PFDN6	HNRNPA3P9
	HNRNPCP2	LINC01607
	C6orf136	LINC02664
	MZT1	ARHGEF2-AS2
	PCDHGA1	H3-2
	PCDHA8	CCL3-AS1
	PCDHA7	H2AC4
	PCDHA5	RN7SL660P
	CCNI2	LINC00624
	NT5M	FLJ42393
	SMIM45	MIR325HG
	RPS3AP47
	HNRNPA1P4
	H1-10-AS1
	RNU6-36P
	MT-RNR2
	MIR770
	RNA5SP244
	RPL15P3
	EEF1B2P6
	RPS7P11
	FTH1P12
	ARL2
	NDUFS3
	MDP1
	CLDN9
	RPSAP61
	EEF1A1P12
	FIS1
	RPL39P5
	RPL7P1
	CYCSP55
	CHCHD3P3
	MSMP
	FRG1JP
	SDHAP2
	MIF-AS1
	PKMP3
	RPL21P16
	IGBP1-AS2
	MIR1282
	AP4M1
	URAHP
	CERS1
	HMGN1P4
	MDC1-AS1
	NDUFA4P1
	HNRNPA1P48
	RPS27AP16
	EIF4A2P4
	TIMM8BP2
	APOC4-APOC2
	DYNC1I2P1
	NPM1P39
	MCRIP1
	RPS29P3
	RPL26P36
	CKS1BP2
	LINC00685
	RPS7P10
	NEDD8P1
	RPS28P7
	CERS6-AS1
	PRELID1P6
	EEF1A1P11
	RASA4CP
	RPS13P2
	CALM2P2
	MT1P3
	UBBP1
	RPL10P6
	IFITM3P4
	HSPB1P2
	RPS29P5
	HLA-K
	MTCO1P53
	SNRPFP1
	NEBL-AS1
	MXRA7P1
	RPS3AP25
	RHOQP2
	SEC1P
	DLGAP4-AS1
	IPO7P1
	RPL23AP25
	RPSAP14
	LIX1L-AS1
	ACBD3-AS1
	RPSAP9
	RPL23AP42
	TECRP1
	RPL24P2
	SUMO1P3
	SUMO2P1
	RPS2P7
	H3P6
	NDUFB9P2
	RPL13AP5
	TMSB4XP1
	PRPF31-AS1
	CDC42P6
	MTCO1P12
	RPL35P1
	PCDHA13
	SMKR1
	COX19
	REPIN1-AS1
	ZIC4-AS1
	ATP5MF
	UBQLN4P1
	ATP5PO
	INHCAP
	C4orf48
	JMJD7
	DNAJC25-GNG10
	RPL32P29
	RPL21P120
	TNXA
	PCDHAC1
	ATP5MF-PTCD1
	PCDHA11
	ARPIN-AP3S2
	SMIM20
	RNPS1P1
	RTN3P1
	RNA5SP216
	PCDHGA12
	PCDHGB6
	PCDHGA7
	KBTBD11-OT1
	PCDHGA6
	PCDHGA8
	DSTNP3
	PCDHGA11
	PCDHGB2
	PCDHGB4
	PCDHGB7
	NPIPB11
	CHKB-CPT1B
	HSPB2-C11orf52
	NAP1L1P1
	CKLF-CMTM1
	ATP6V1G2-DDX39B
	PCDHA3
	MTRNR2L8
	STX5-DT
	KCNK4-TEX40
	RPL36A-HNRNPH2
	MAP1LC3B2
	SPECC1L-ADORA2A
	HSPE1P2
	TUBB3
	ZHX1-C8orf76
	HSP90B2P
	HSPE1P3
	ANP32BP1
	ELOCP2
	NSFP1
	COSMOC
	DNAAF4-CCPG1
	ISY1-RAB43
	PCDHGB3
	PCDHGA4
	MRPL12
	HNRNPCP4
	RPS7P1
	EEF1E1-BLOC1S5
	DM1-AS
	HIKESHIP2
	PTOV1-AS2
	TSNAX-DISC1
	MTCO2P22
	RNU4-5P
	ZSWIM8-AS1
	STAG3L5P-PVRIG2P-PILRB
	RBAK-RBAKDN
	PSMB3
	NDUFAF2P1
	WASH9P
	KMT5AP1
	THRIL
	MATR3
	ABALON
	IQCJ-SCHIP1
	ARID1B
	SYNE2
	KMT2C
	TRAF3IP2
	QSER1
	SNCAIP
	NTN1
	ANKRD44
	CD84
	PMS2P4
	RORA
	NEDD4
	LRP6
	ACAP1
	KDM5A
	GLI2
	N4BP2
	PMS2P1
	OPHN1
	CPB2
	TCF7
	STK17B
	FYB1
	KAT6A
	ZNF586
	FAT1
	REST
	RBM41
	GPATCH2L
	PLEKHG2
	ZFHX4
	CCDC80
	SEMA6A
	BTAF1
	CDHR5
	SERPIND1
	CECR2
	TTC28
	TPTEP1
	TNRC6B
	CDKL1
	CEP128
	FERMT1
	SMCHD1
	JADE3
	PCDH11X
	SYTL4
	ACP5
	INTS6
	MLYCD
	ATP8B4
	EYA1
	TRPS1
	SIGLEC8
	ZNF85
	CDK6
	PON3
	ITGB8
	CYP3A5
	RBM28
	EZH2
	MEST
	FKTN
	ECM2
	CCNJ
	CUBN
	TRDMT1
	MAP2K6
	GNRHR
	CRACD
	ZBTB16
	ELP4
	EXPH5
	TSPAN11
	MAK
	CEP85L
	MDFI
	PCDHB3
	LIFR
	XRN1
	NKTR
	INO80D
	SLC35F5
	TANC1
	KCNJ13
	BIRC6
	PARD3B
	ALMS1
	DLEU2L
	PDC
	RPE65
	MYCL
	SLC5A9
	KMT2A
	PHF3
	FBXO30
	KLF12
	OTUD4P1
	DNAH7
	CYP20A1
	INVS
	PROX2
	GPR75
	ATAD2B
	PRLHR
	KANSL1
	MLANA
	PCDHB12
	TNFSF18
	SLC10A7
	SPART-AS1
	SMAD9
	TAS2R10
	ZSCAN20
	CSMD2
	EEPD1
	KIAA0087
	MED13L
	ITPR2
	TTC21B
	BAZ2B
	AGO2
	GPR18
	IRF1
	MIR9-1HG
	PLGLB2
	FOSB
	FAM182A
	AGO3
	ZNF484
	ATP13A4
	BEST3
	RAB3IP
	TAS2R3
	TAS2R4
	TAS2R5
	AKAP9
	STEAP4
	LSM8
	VPS13C
	ACKR4
	ZNF557
	CYP2G1P
	ZNF141
	GJA9
	VPS13B
	PCBD2
	DPH6
	NOTCH2
	SLC37A2
	FAM189A2
	FAM186B
	NHSL1
	CEP350
	RC3H1
	DOCK10
	ANKRD36
	EDNRB
	TLR4
	STX17
	MYC
	DENND4C
	SLCO5A1
	DDX60
	DCUN1D5
	FXYD2
	DUOX1
	IFI44L
	ENTPD1
	PLCE1
	TET1
	MSTN
	ZGRF1
	BMP2K
	RNF113B
	MDGA2
	ARMH4
	ADAM21
	STON2
	TICRR
	PMM2
	IGSF6
	NKD1
	ZNF287
	ASXL3
	GREB1L
	POU2F1
	PIGM
	ADAMTSL4
	KCNN3
	WDPCP
	ASXL2
	GASK1A
	ZNF660
	OSBPL11
	SPATA5
	SKP2
	ZNF300
	PCDHB18P
	FGD2
	SCUBE3
	IRAK1BP1
	RARS2
	SHPRH
	CREB5
	EGFR
	KDM6A
	HDAC8
	FRMPD3
	DOCK11
	HMBOX1
	IFNK
	ZNF462
	ZC3H12C
	ATM
	PCDH15
	FREM2
	FER
	TEX9
	ZNF827
	SACS
	DST
	GRID2
	SETBP1
	DCLRE1C
	CLEC4F
	ZNF117
	BCL2L11
	CNKSR3
	ANKFN1
	SEMA3D
	CHST9
	ABI3BP
	DISP1
	TSEN2
	CCDC144B
	CCDC144CP
	NAA11
	BACH1
	SFXN2
	KAT6B
	UBN2
	GRHL3
	FANCC
	SHROOM4
	ZSCAN12
	ZNF221
	ZNF66
	ZNF714
	ZNF577
	CLPB
	ACOT11
	NFIA
	VCAM1
	RBM15
	B3GALNT2
	DISC1
	CLHC1
	ALMS1P1
	GABRB1
	IGFN1
	WDFY3
	RNF180
	ADGRV1
	PGGT1B
	F2RL1
	USP49
	ZNF704
	TP53INP1
	ABCA1
	PRSS37
	KIF27
	SHOC1
	KIAA1958
	ATP7A
	BRWD3
	FAT3
	WRN
	TSHR
	ZNF22-AS1
	VWA2
	ARHGAP42
	STXBP4
	RNF169
	PRTG
	ZNF91
	CDK12
	ZNF528
	ZNF283
	SETD5
	HOOK3
	GLYCTK
	LDLRAD4
	LRP1B
	TET2
	ZBTB5
	ZNF507
	ATOH8
	C2orf68
	ZNF608
	AR
	SH3TC2
	IL1RAPL1
	BTD
	MAP3K2
	CCDC144A
	IRX1
	ATF7
	POLH
	AKAP13
	PYGO1
	CHD7
	DSEL
	DSCAM
	BPTF
	GPR82
	ATF7IP
	JMJD1C
	NME6
	ID4
	CXCR6
	PDE3A
	CYP7B1
	MFSD4B
	ZNF417
	PEAK1
	APOBEC4
	SPDYE2B
	RNF213
	PHC3
	LRRC63
	MGA
	STAG3L3
	RALGAPA1
	ANKRD36C
	WDR49
	AMZ1
	GPR171
	TRAF6
	ERCC4
	LINC00476
	LRRN1
	DLEU1
	TMEM39A
	ATAD5
	RTTN
	OR4N2
	USF3
	B3GNT5
	NCKAP5
	SOX11
	MUC20
	CHD9
	ZNF491
	SUMO4
	ZNF518A
	ZNF619
	TSPYL6
	LCORL
	ZNF543
	BEND3
	KLHL11
	ACTG1P1
	ZNF713
	EFCAB13
	ZNF852
	ZNF552
	RAB39A
	SLC24A3-AS1
	MKRN3
	DNHD1
	ZNF154
	ZNF571
	DIP2C-AS1
	H2BC4
	MAB21L1
	SMG1P3
	ZNF792
	ZNF572
	F2R
	HECW1-IT1
	ZNF678
	P2RY13
	CELF2-AS1
	RELL1
	RFX7
	GINS3
	MGAT4C
	ZNF708
	ERCC6L2
	ASB18
	FIGN
	PDSS1P1
	ZNF662
	GPC6
	CEP57L1
	GTF2H2C
	SMG1P5
	KLHL25
	GUSBP1
	B3GALT5
	RBM12B
	ZNF730
	PRKX
	PCDH9
	H2AC20
	MAML2
	KRBA2
	ZNF93
	B3GALT5-AS1
	NUTM2A
	TMEM106A
	SPDYE16
	SGCZ
	PURA
	ZBTB37
	SPPL2C
	SMG1P4
	ARL17A
	ZNF829
	POMK
	PTCH1
	NKAIN3
	ZNF749
	ZNF555
	DYNC2H1
	LUZP2
	TET3
	VMAC
	C2orf88
	ZNF70
	ZSCAN23
	NUTM2G
	NUTM2B
	PEAK3
	ZNF559
	SELL
	PTAR1
	CC2D2B
	LINC00319
	FSIP2
	ZNF292
	ARID2
	RIMKLBP1
	ZNF573
	USP32P3
	ZNF724
	FAT4
	LCOR
	ZNF107
	ZNF493
	GARS1-DT
	MFSD14C
	TRRAP
	GDAP2
	XRCC2
	ZNF782
	LINC00173
	ZNF431
	NHLRC2
	ANKRD36B
	ZNF100
	ZMYM1
	H4C3
	IGF2R
	PGAP1
	ZNF772
	MIRLET7BHG
	VEPH1
	GYPE
	IRF1-AS1
	CPLANE1
	HRNR
	ZNF121
	HELZ
	ZKSCAN8
	ZNF587
	ZNF808
	ZNF43
	PLN
	KCNRG
	LRBA
	MDM4
	SSBP3-AS1
	F5
	ZNF652
	LRIG2
	RN7SKP184
	RN7SKP90
	VTRNA1-1
	SNORA73B
	RNU6-105P
	SNORA74A
	RN7SKP237
	RNVU1-6
	RN7SKP55
	RN7SKP9
	RN7SKP292
	SHISA5P2
	PRDX6-AS1
	ADAMTSL4-AS1
	H2BC18
	C6orf163
	SNHG5
	LINC00632
	MBD5
	ZNF814
	ZNF551
	OR2H2
	RANBP17
	INSYN2B
	LINC01291
	FAM71F2
	TMEM88B
	SCGB2B2
	SPDYE2
	DPF3
	C21orf62-AS1
	RNU1-67P
	SNORA80D
	RNVU1-14
	SNORA66
	TAS2R15P
	TAS2R13
	SNORD17
	LINC02656
	PABPN1P1
	C1orf220
	SCYL2P1
	ZNF254
	MARCKSL1P1
	RPS3P6
	ANXA2P1
	ERV3-1
	FIRRE
	EIF4A1P8
	RPL32P11
	RPL3P6
	ZNF891
	MYCBP
	PDPR2P
	FAM185BP
	NUTM2D
	ZNF727
	LINC01347
	RPS15AP3
	VDAC2P1
	ALOX12-AS1
	GUSBP18
	FAM66B
	GUSBP9
	FEN1P1
	ANKRD18EP
	RPS16P5
	PIMREGP3
	NIP7P3
	RPL17P25
	GAPDHP42
	H2BC19P
	FCF1P5
	RPL5P18
	RPS18P9
	LINC01465
	RN7SKP151
	SNORA36B
	RN7SKP125
	RNU2-61P
	RNU2-64P
	RN7SKP30
	NUTM2A-AS1
	LINC00630
	TVP23CP1
	UHRF2P1
	RAD17P2
	CCDC18-AS1
	LINC02593
	CHROMR
	YES1P1
	USP12P2
	CCNT2-AS1
	EGFR-AS1
	VEZTP1
	SNHG14
	PTPN2P2
	WARS2-IT1
	MTND2P5
	TMCO1-AS1
	RPL23AP14
	LINC01117
	RTCA-AS1
	SHMT1P1
	NTM-AS1
	TMEM72-AS1
	THRB-IT1
	EIPR1-IT1
	POT1-AS1
	LINC00863
	GOLGA2P7
	ZNF33BP1
	RPS12P26
	DUXAP9
	LINC01678
	ANKRD49P2
	LINC01504
	MPRIP-AS1
	JPX
	PLCB1-IT1
	NUTM2B-AS1
	UBE2D3P2
	DOCK4-AS1
	EDNRB-AS1
	ZNF469
	HNRNPA3P15
	PACRG-AS3
	TMEM30A-DT
	ERCC6
	RIMKLBP2
	ZNF567-DT
	MTND4P32
	FTCDNL1
	SGMS1-AS1
	CFLAR-AS1
	RPS3AP38
	ST7-AS2
	SLC16A1-AS1
	RPL7AP51
	LINC01748
	LINC02848
	PAPPA-AS2
	SNX30-DT
	UBE2V1P1
	PLCG1-AS1
	ENTPD1-AS1
	FAM66C
	SMCR5
	CUTALP
	TAS2R46
	FABP7P1
	LHFPL3-AS1
	SMYD3-AS1
	LINC01359
	LINC00511
	ZNF717
	WDR11-DT
	NSA2P5
	NALF1-IT1
	RBM26-AS1
	RPL35AP2
	ASIC4-AS1
	PDE4B-AS1
	NCAM1-AS1
	MROCKI
	MIR1302-9HG
	HNRNPA1P14
	UST-AS1
	MTATP6P11
	PTPN2P1
	NLGN1-AS1
	NPM1P30
	PGK1P1
	LNC-LBCS
	ANKRD49P1
	LINC01546
	SNRPGP9
	NUTM2E
	DCAF8-DT
	ZNF883
	SRGAP3-AS2
	PPIAP91
	SPATA13
	WEE2-AS1
	HMGB3P4
	KPNA2P2
	SUMO2P8
	CCDC26
	RABGEF1P1
	TTTY10
	PNPT1P1
	DANT1
	RLIMP1
	PDC-AS1
	LINC01159
	MTCYBP32
	ATP8A2P2
	GK3P
	MTND2P2
	MIR181A1HG
	HMGB3P9
	ALMS1-IT1
	ZBTB47-AS1
	PHBP9
	PHBP4
	STARD13-IT1
	SPDYE21
	SERPINB9P1
	FTX
	DNM3OS
	LINC01001
	RPS2P16
	SRGAP2-AS1
	LINC01293
	RPL23AP11
	RPL12P15
	AHI1-DT
	RPL6P6
	HCG18
	LINC02884
	RPL13AP17
	ACTG1P10
	LINC00689
	FAM27C
	PTCHD3P2
	RPL21P43
	LINC-PINT
	TMSB15B-AS1
	PA2G4P6
	EP300-AS1
	RFX3-DT
	MTRNR2L4
	SLC30A6P1
	MTND1P32
	FAM215B
	MTCYBP3
	MRTFA-AS1
	EEF1A1P3
	LINC02642
	KANTR
	HIVEP2-DT
	ING2-DT
	KIZ-AS1
	ETF1P1
	RERE-AS1
	DDX3P1
	CRYZP1
	ERVH48-1
	RPS15AP6
	LINC00472
	LINC01719
	RPS25P3
	LINC00513
	KRT8P15
	ERI3-IT1
	GBX2-AS1
	CYP2T1P
	PBX1-AS1
	NCKAP5-AS1
	CAVIN2-AS1
	LINC01237
	ENOX1-AS1
	TM9SF5P
	RPL7P36
	RPL30P2
	TATDN1P1
	ZNF736
	SP2-AS1
	PPIAP90
	SDCBP2-AS1
	EPCAM-DT
	PIGFP2
	MIR155HG
	SOX9-AS1
	TEX21P
	CDC42P1
	GRID1-AS1
	FABP7P2
	DANT2
	DNM1P51
	EPN2-AS1
	DOCK7-DT
	LINC02250
	OLMALINC
	TBCAP2
	CPB2-AS1
	RBMS3-AS3
	RHOA-IT1
	MTND1P21
	COP1-DT
	NSA2P1
	COX10-DT
	SCN1A-AS1
	LINC01069
	MFF-DT
	LINC01424
	DAPK1-IT1
	MKLN1-AS
	LINC00299
	TIMM9P1
	FUCA1P1
	DDX10P1
	ZNF295-AS1
	SMG1P1
	NDUFA9P1
	ZNF737
	LINC01409
	RNGTTP1
	RPS3AP29
	RPS15AP29
	NFIA-AS1
	NFIA-AS2
	CELF2-AS2
	COX6CP10
	RNF14P3
	LINC01410
	IFITM3P5
	PAXBP1-AS1
	LINC01877
	OR7E7P
	LINC00707
	SCARNA7
	NCK1-DT
	RPS20P22
	RN7SL752P
	SETP11
	MTND1P16
	PARGP1
	PRDX3P4
	YBX1P3
	RPL9P30
	FOXO3B
	CDKN2B-AS1
	RPL21P123
	UBA52P8
	RN7SL459P
	LINC02024
	RPL12P31
	RN7SL629P
	CBX5P1
	XACT
	RN7SL188P
	ELOCP19
	MUC20-OT1
	RPS3AP14
	LINC02082
	LINC00901
	RN7SL144P
	RPS26P21
	ERVW-1
	RN7SL239P
	RPSAP36
	STON1
	RN7SL285P
	FGF14-IT1
	RN7SL815P
	RN7SL370P
	DNAJB6P7
	RPL12P24
	RPS4XP14
	DUBR
	RN7SL67P
	RN7SL487P
	RN7SL743P
	PPIEL
	RPL5P24
	RN7SL417P
	RPS2P41
	RPS4XP6
	PDCL3P4
	RPSAP51
	RN7SL151P
	RPS3AP42
	RPS3AP35
	DUXAP10
	N4BP2L2
	GABPB1-AS1
	ARAP1-AS2
	GALNT7-DT
	MSANTD2-AS1
	LINC00461
	KLRK1-AS1
	DRAIC
	NSMCE1-DT
	RAB30-DT
	RRS1-DT
	ANKRD42-DT
	FBXO38-DT
	UBL7-DT
	STX18-AS1
	TMEM161B-DT
	SYBU-AS1
	ANK2-AS1
	GAPDHP61
	SEMA6A-AS1
	PCDHGB8P
	CHD1-DT
	KRT8P48
	ALG1L9P
	ZNF652-AS1
	R3HDM2P1
	COPB2-DT
	AIG1P1
	PSD2-AS1
	PRDX2P3
	SEMA6A-AS2
	RACK1P3
	PARP4P3
	PDLIM1P4
	LINC01088
	UGDH-AS1
	NAIP
	PPP2R2B-IT1
	TARS1-DT
	LINC02021
	MTRNR2L5
	MCPH1-AS1
	ITGA2-AS1
	CCT7P2
	SLC7A11-AS1
	MAPK10-AS1
	PKD2L2-DT
	USP38-DT
	STK32A-AS1
	HEATR5A-DT
	UBE2CP3
	NUDT16-DT
	PABPC1P7
	GMDS-DT
	GAPDHP66
	BMS1P2
	RIPK2-DT
	MAGI2-AS1
	HSPD1P11
	FAM90A25P
	LINC01094
	PITPNM2-AS1
	MALAT1
	SCARNA1
	GUSBP3
	LINC00534
	PRSS51
	ALG11
	TPTE2P1
	LINC01608
	MAPRE1P1
	INTS9-AS1
	CASC19
	PAICSP4
	SF3A3P2
	ENPP7P12
	PSMA2P1
	NAV2-AS4
	MEX3A
	TMEM9B-AS1
	OPCML-IT1
	SCARNA9
	FAM66D
	CENATAC-DT
	STX17-DT
	DDX18P5
	TAS2R43
	HSPD1P13
	EBLN2
	SMIM14-DT
	H3P33
	MIR9-3HG
	RMST
	TAS2R20
	CYP2A6
	CBX3P4
	SOX5-AS1
	TAS2R30
	ZNF486
	ENPP7P5
	STH
	ZNF253
	LINC02282
	CLIP1-AS1
	FOXG1-AS1
	LINC02293
	PARK7P1
	PHBP19
	ZBED6
	MIRLET7IHG
	LINC00609
	ILF2P2
	OR5BK1P
	MRS2P2
	PRANCR
	PAPLN-AS1
	ZNF578
	LINC02207
	SRMP2
	LRFN5-DT
	UBE2CP1
	HIF1A-AS3
	ITPK1-AS1
	ZMYND19P1
	KRT18P7
	CAP2P1
	NPM1P20
	DDX18P1
	LINC00928
	USP3-AS1
	CSPG4P12
	HNRNPMP1
	UBE2Q2L
	SLC28A2-AS1
	TYRO3P
	FKBP1AP2
	LINC02284
	CSPG4P11
	CTCF-DT
	SPDYE6
	PPIAP51
	AQP4-AS1
	LCMT1-AS1
	ERVK13-1
	UNGP1
	DIS3L-AS1
	LINC01355
	PSMD7-DT
	DLGAP1-AS5
	AGK-DT
	GAN
	NDUFB10P2
	DLGAP1-AS2
	SNORD3B-2
	LINC02175
	ALOX12P2
	RNF213-AS1
	RYKP1
	TAPT1-AS1
	RN7SL4P
	EEF1DP7
	RN7SL615P
	NOTCH2NLA
	PRKCA-AS1
	L3MBTL4-AS1
	MIR133A1HG
	CLASP1-AS1
	DTX2P1-UPK3BP1-PMS2P11
	NARF-IT1
	SH3GL1P1
	MRPL37P1
	ZNF790-AS1
	SNHG22
	LINC00906
	TCF4-AS2
	ZNF571-AS1
	MIR23AHG
	RPSAP57
	VN1R83P
	ZNF497-AS1
	ZNF350-AS1
	ZNF587B
	KCNQ1OT1
	CCNYL6
	MIRLET7A1HG
	ATP6V0D1-DT
	POC1B-AS1
	SNX2P1
	RPAP2P1
	SCML2P2
	BNIP3P4
	TMCC1-DT
	HIRAP1
	TAGAP-AS1
	H3-3A-DT
	AFAP1-AS1
	LINC02018
	RAB33B-AS1
	DGCR11
	H4C12
	VN1R76P
	FRMD6-AS1
	RN7SL2
	FAM27E3
	CASTOR2
	RNVU1-27
	SNORA73A
	RNVU1-25
	SPDYE10
	LINC02371
	BSNDP2
	FAM242F
	H3C1
	RN7SL1
	ANKRD20A3P
	FRG1HP
	BMS1P14
	H4C5
	HYDIN2
	H2AC8
	LINC00235
	H4C4
	RPPH1
	ZNF670
	Telomerase-vert
	GLIDR
	SCARNA2
	H4C2
	HEXD-IT1
	SND1-IT1
	TSTD3
	LINC00216
	MAPT-IT1
	SNX18P12
	DNM1P41
	TBC1D22A-AS1
	CH507-42P11.6
	EIF1B-AS1
	LINC00836
	N4BP2L2-IT2
	PTENP1-AS
	LINC01338
	SNHG4
	CICP14
	SEPSECS-AS1
	GTF2IP12
	ZNF285DP
